# Supplementary material for: Disease burden of migraine and tension-type headache in non-high-income East and Southeast Asia from 1990 to 2019
Source: PubMed Central journal article supplement (PMC10041715; doi:10.1186/s10194-023-01566-5), 2023-03-27
Supplement: 10194_2023_1566_MOESM1_ESM.pdf [file 10194_2023_1566_MOESM1_ESM.pdf]

## Catalogue

- ✧ [Table S1. The age standardized prevalence rates of migraine in East and Southeast Asia in different genders in 2019.](#)
- ✧ [Table S2. The age standardized incidence rates of migraine in East and Southeast Asia in different genders in 2019.](#)
- ✧ [Table S3. The age standardized YLDs rates of migraine in East and Southeast Asia in different genders in 2019.](#)
- ✧ [Table S4. The age standardized prevalence rates of tension-type headache in East and Southeast Asia in different genders in 2019.](#)
- ✧ [Table S5. The age standardized incidence rates of tension-type headache in East and Southeast Asia in different genders in 2019.](#)
- ✧ [Table S6. The age standardized YLDs rates of tension-type headache in East and Southeast Asia in different genders in 2019.](#)
- ✧ [Table S7. The absolute numbers and rates of prevalence of migraine in different age groups in East Asia in 2019.](#)
- ✧ [Table S8. The absolute numbers and rates of incidence of migraine in different age groups in East Asia in 2019.](#)
- ✧ [Table S9. The absolute numbers and rates of YLDs of migraine in different age groups in East Asia in 2019.](#)
- ✧ [Table S10. The absolute numbers and rates of prevalence of migraine in different age groups in Southeast Asia in 2019.](#)
- ✧ [Table S11. The absolute numbers and rates of incidence of migraine in different age groups in Southeast Asia in 2019.](#)
- ✧ [Table S12. The absolute numbers and rates of YLDs of migraine in different age groups in Southeast Asia in 2019.](#)
- ✧ [Table S13. The absolute numbers and rates of prevalence of tension-type headache in different age groups in East Asia in 2019.](#)
- ✧ [Table S14. The absolute numbers and rates of incidence of tension-type headache in different age groups in East Asia in 2019.](#)
- ✧ [Table S15. The absolute numbers and rates of YLDs of tension-type headache in different age groups in East Asia in 2019.](#)
- ✧ [Table S16. The absolute numbers and rates of prevalence of tension-type headache in different age groups in Southeast Asia in 2019.](#)
- ✧ [Table S17. The absolute numbers and rates of incidence of tension-type headache in different age groups in Southeast Asia in 2019.](#)
- ✧ [Table S18. The absolute numbers and rates of YLDs of tension-type headache in different age groups in Southeast Asia in 2019.](#)
- ✧ [Table S19. The ratio of male to female prevalence, incidence, and YLDs rates of migraine according to different age groups in East Asia.](#)
- ✧ [Table S20. The ratio of male to female prevalence, incidence, and YLDs rates of migraine according to different age groups in Southeast Asia.](#)
- ✧ [Table S21. The ratio of male to female prevalence, incidence, and YLDs rates of tension-type headache according to different age groups in East Asia.](#)
- ✧ [Table S22. The ratio of male to female prevalence, incidence, and YLDs rates of tension-type](#)

headache according to different age groups in Southeast Asia.

- ✧ Table S23. The differences of age standardized prevalence rates of migraine between East Asia, Southeast Asia, and other regions from 1990 to 2019.
- ✧ Table S24. The differences of age standardized prevalence rates of tension-type headache between East Asia, Southeast Asia, and other regions from 1990 to 2019.
- ✧ Table S25. The differences of age standardized incidence rates of migraine between East Asia, Southeast Asia, and other regions from 1990 to 2019.
- ✧ Table S26. The differences of age standardized incidence rates of tension-type headache between East Asia, Southeast Asia, and other regions from 1990 to 2019.
- ✧ Table S27. The differences of age standardized YLDs rates of migraine between East Asia, Southeast Asia, and other regions from 1990 to 2019.
- ✧ Table S28. The differences of age standardized YLDs rates of tension-type headache between East Asia, Southeast Asia, and other regions from 1990 to 2019.
- ✧ Table S29. The SDI and age standardized YLDs rates of migraine in East and Southeast Asia from 1990 to 2019.
- ✧ Table S30. The SDI and age standardized YLDs rates of tension-type headache in East and Southeast Asia from 1990 to 2019.

**Table S1. The age standardized prevalence rates of migraine in East and Southeast Asia in different genders in 2019**

| Country/Region                           | Male   |        |        | Female |        |        |
|------------------------------------------|--------|--------|--------|--------|--------|--------|
|                                          | Mean   | Upper  | Lower  | Mean   | Upper  | Lower  |
| Viet Nam                                 | 11,947 | 14,139 | 10,117 | 19,044 | 22,268 | 16,170 |
| Timor-Leste                              | 11,947 | 14,139 | 10,117 | 19,044 | 22,268 | 16,170 |
| Thailand                                 | 12,614 | 14,876 | 10,674 | 21,935 | 25,563 | 18,659 |
| Sri Lanka                                | 11,947 | 14,139 | 10,117 | 19,044 | 22,268 | 16,170 |
| Seychelles                               | 11,947 | 14,139 | 10,117 | 19,044 | 22,268 | 16,170 |
| Philippines                              | 12,378 | 14,442 | 10,658 | 19,460 | 22,248 | 17,006 |
| Myanmar                                  | 11,947 | 14,139 | 10,117 | 19,044 | 22,268 | 16,170 |
| Mauritius                                | 11,947 | 14,139 | 10,117 | 19,044 | 22,268 | 16,170 |
| Maldives                                 | 11,947 | 14,139 | 10,117 | 19,044 | 22,268 | 16,170 |
| Malaysia                                 | 11,370 | 13,574 | 9,651  | 16,656 | 19,626 | 14,159 |
| Lao People's<br>Democratic Republic      | 11,947 | 14,139 | 10,117 | 19,044 | 22,268 | 16,170 |
| Indonesia                                | 12,378 | 14,442 | 10,658 | 19,460 | 22,248 | 17,006 |
| Cambodia                                 | 11,947 | 14,139 | 10,117 | 19,044 | 22,268 | 16,170 |
| Southeast Asia                           | 12,221 | 14,269 | 10,477 | 19,484 | 22,410 | 16,870 |
| Taiwan<br>(Province of China)            | 9,128  | 10,807 | 7,707  | 16,286 | 19,147 | 13,878 |
| Democratic People's<br>Republic of Korea | 8,348  | 9,870  | 7,083  | 14,849 | 17,451 | 12,632 |
| China                                    | 8,526  | 9,952  | 7,380  | 14,919 | 17,248 | 12,992 |
| East Asia                                | 8,533  | 9,957  | 7,392  | 14,941 | 17,267 | 13,021 |

**Table S2. The age standardized incidence rates of migraine in East and Southeast Asia in different genders in 2019**

| Country/Region                           | Male  |       |       | Female |       |       |
|------------------------------------------|-------|-------|-------|--------|-------|-------|
|                                          | Mean  | Upper | Lower | Mean   | Upper | Lower |
| Viet Nam                                 | 983   | 1,137 | 837   | 1,536  | 1,767 | 1,309 |
| Timor-Leste                              | 983   | 1,137 | 837   | 1,536  | 1,767 | 1,309 |
| Thailand                                 | 1,021 | 1,184 | 856   | 1,654  | 1,913 | 1,417 |
| Sri Lanka                                | 983   | 1,137 | 837   | 1,536  | 1,767 | 1,309 |
| Seychelles                               | 983   | 1,137 | 837   | 1,536  | 1,767 | 1,309 |
| Philippines                              | 1,016 | 1,149 | 888   | 1,594  | 1,768 | 1,398 |
| Myanmar                                  | 983   | 1,137 | 837   | 1,536  | 1,767 | 1,309 |
| Mauritius                                | 983   | 1,137 | 837   | 1,536  | 1,767 | 1,309 |
| Maldives                                 | 983   | 1,137 | 837   | 1,536  | 1,767 | 1,309 |
| Malaysia                                 | 952   | 1,106 | 803   | 1,419  | 1,626 | 1,202 |
| Lao People's<br>Democratic Republic      | 983   | 1,137 | 837   | 1,536  | 1,767 | 1,309 |
| Indonesia                                | 1,016 | 1,149 | 888   | 1,594  | 1,768 | 1,398 |
| Cambodia                                 | 983   | 1,137 | 837   | 1,536  | 1,767 | 1,309 |
| Southeast Asia                           | 1,003 | 1,144 | 870   | 1,572  | 1,766 | 1,368 |
| Taiwan<br>(Province of China)            | 753   | 870   | 636   | 1,317  | 1,514 | 1,114 |
| Democratic People's<br>Republic of Korea | 704   | 818   | 595   | 1,249  | 1,429 | 1,069 |
| China                                    | 697   | 787   | 609   | 1,248  | 1,400 | 1,100 |
| East Asia                                | 698   | 790   | 609   | 1,249  | 1,404 | 1,101 |

**Table S3. The age standardized YLDs rates of migraine in East and Southeast Asia in different genders in 2019**

| Country/Region                           | Male |       |       | Female |       |       |
|------------------------------------------|------|-------|-------|--------|-------|-------|
|                                          | Mean | Upper | Lower | Mean   | Upper | Lower |
| Viet Nam                                 | 447  | 1,028 | 58    | 717    | 1,782 | 73    |
| Timor-Leste                              | 443  | 1,027 | 56    | 712    | 1,786 | 71    |
| Thailand                                 | 470  | 1,103 | 57    | 815    | 2,023 | 72    |
| Sri Lanka                                | 444  | 1,020 | 58    | 712    | 1,775 | 72    |
| Seychelles                               | 445  | 1,019 | 58    | 712    | 1,775 | 71    |
| Philippines                              | 462  | 1,057 | 64    | 727    | 1,794 | 78    |
| Myanmar                                  | 445  | 1,010 | 58    | 711    | 1,759 | 71    |
| Mauritius                                | 443  | 1,011 | 58    | 710    | 1,752 | 71    |
| Maldives                                 | 448  | 1,027 | 58    | 714    | 1,781 | 72    |
| Malaysia                                 | 427  | 1,004 | 58    | 629    | 1,548 | 72    |
| Lao People's<br>Democratic Republic      | 445  | 1,026 | 57    | 711    | 1,774 | 72    |
| Indonesia                                | 463  | 1,059 | 64    | 728    | 1,795 | 78    |
| Cambodia                                 | 445  | 1,022 | 57    | 709    | 1,758 | 72    |
| Southeast Asia                           | 457  | 1,060 | 61    | 729    | 1,798 | 74    |
| Taiwan<br>(Province of China)            | 344  | 775   | 54    | 601    | 1,411 | 71    |
| Democratic People's<br>Republic of Korea | 319  | 714   | 55    | 545    | 1,299 | 64    |
| China                                    | 328  | 741   | 64    | 548    | 1,300 | 64    |
| East Asia                                | 328  | 740   | 64    | 548    | 1,304 | 64    |

**Table S4. The age standardized prevalence rates of tension-type headache in East and Southeast Asia in different genders in 2019**

| Country/Region                           | Male   |        |        | Female |        |        |
|------------------------------------------|--------|--------|--------|--------|--------|--------|
|                                          | Mean   | Upper  | Lower  | Mean   | Upper  | Lower  |
| Viet Nam                                 | 24,289 | 28,009 | 20,558 | 26,306 | 30,108 | 22,585 |
| Timor-Leste                              | 24,289 | 28,009 | 20,558 | 26,306 | 30,108 | 22,585 |
| Thailand                                 | 24,289 | 28,009 | 20,558 | 26,306 | 30,108 | 22,585 |
| Sri Lanka                                | 24,289 | 28,009 | 20,558 | 26,306 | 30,108 | 22,585 |
| Seychelles                               | 24,289 | 28,009 | 20,558 | 26,306 | 30,108 | 22,585 |
| Philippines                              | 25,307 | 28,456 | 22,293 | 27,322 | 30,546 | 24,199 |
| Myanmar                                  | 24,289 | 28,009 | 20,558 | 26,306 | 30,108 | 22,585 |
| Mauritius                                | 24,289 | 28,009 | 20,558 | 26,306 | 30,108 | 22,585 |
| Maldives                                 | 24,289 | 28,009 | 20,558 | 26,306 | 30,108 | 22,585 |
| Malaysia                                 | 24,289 | 28,009 | 20,558 | 26,306 | 30,108 | 22,585 |
| Lao People's<br>Democratic Republic      | 24,289 | 28,009 | 20,558 | 26,306 | 30,108 | 22,585 |
| Indonesia                                | 25,307 | 28,456 | 22,293 | 27,322 | 30,546 | 24,199 |
| Cambodia                                 | 24,289 | 28,009 | 20,558 | 26,306 | 30,108 | 22,585 |
| Southeast Asia                           | 24,844 | 28,161 | 21,508 | 26,848 | 30,288 | 23,544 |
| Taiwan<br>(Province of China)            | 16,617 | 19,286 | 14,077 | 19,496 | 22,584 | 16,643 |
| Democratic People's<br>Republic of Korea | 16,631 | 19,293 | 14,086 | 19,476 | 22,564 | 16,625 |
| China                                    | 16,863 | 19,049 | 14,717 | 20,033 | 22,617 | 17,506 |
| East Asia                                | 16,854 | 19,065 | 14,704 | 20,014 | 22,625 | 17,486 |

**Table S5. The age standardized incidence rates of tension-type headache in East and Southeast Asia in different genders in 2019**

| Country/Region                           | Male  |        |       | Female |        |       |
|------------------------------------------|-------|--------|-------|--------|--------|-------|
|                                          | Mean  | Upper  | Lower | Mean   | Upper  | Lower |
| Viet Nam                                 | 8,490 | 9,575  | 7,442 | 9,147  | 10,275 | 8,040 |
| Timor-Leste                              | 8,490 | 9,575  | 7,442 | 9,147  | 10,275 | 8,040 |
| Thailand                                 | 8,490 | 9,575  | 7,442 | 9,147  | 10,275 | 8,040 |
| Sri Lanka                                | 8,490 | 9,575  | 7,442 | 9,147  | 10,275 | 8,040 |
| Seychelles                               | 8,490 | 9,575  | 7,442 | 9,147  | 10,275 | 8,040 |
| Philippines                              | 9,066 | 10,199 | 8,065 | 9,782  | 10,962 | 8,651 |
| Myanmar                                  | 8,490 | 9,575  | 7,442 | 9,147  | 10,275 | 8,040 |
| Mauritius                                | 8,490 | 9,575  | 7,442 | 9,147  | 10,275 | 8,040 |
| Maldives                                 | 8,490 | 9,575  | 7,442 | 9,147  | 10,275 | 8,040 |
| Malaysia                                 | 8,490 | 9,575  | 7,442 | 9,147  | 10,275 | 8,040 |
| Lao People's<br>Democratic Republic      | 8,490 | 9,575  | 7,442 | 9,147  | 10,275 | 8,040 |
| Indonesia                                | 9,066 | 10,199 | 8,065 | 9,782  | 10,962 | 8,651 |
| Cambodia                                 | 8,490 | 9,575  | 7,442 | 9,147  | 10,275 | 8,040 |
| Southeast Asia                           | 8,806 | 9,906  | 7,793 | 9,489  | 10,645 | 8,400 |
| Taiwan<br>(Province of China)            | 6,205 | 7,024  | 5,400 | 7,185  | 8,121  | 6,269 |
| Democratic People's<br>Republic of Korea | 6,205 | 7,024  | 5,400 | 7,185  | 8,121  | 6,269 |
| China                                    | 6,290 | 7,119  | 5,519 | 7,375  | 8,240  | 6,521 |
| East Asia                                | 6,287 | 7,114  | 5,530 | 7,368  | 8,233  | 6,507 |

**Table S6. The age standardized YLDs rates of tension-type headache in East and Southeast Asia in different genders in 2019**

| Country/Region                           | Male |       |       | Female |       |       |
|------------------------------------------|------|-------|-------|--------|-------|-------|
|                                          | Mean | Upper | Lower | Mean   | Upper | Lower |
| Viet Nam                                 | 47   | 196   | 12    | 55     | 194   | 15    |
| Timor-Leste                              | 46   | 197   | 12    | 54     | 195   | 15    |
| Thailand                                 | 47   | 190   | 12    | 55     | 192   | 15    |
| Sri Lanka                                | 46   | 194   | 12    | 54     | 194   | 15    |
| Seychelles                               | 47   | 190   | 12    | 54     | 194   | 15    |
| Philippines                              | 49   | 203   | 13    | 58     | 198   | 16    |
| Myanmar                                  | 46   | 195   | 12    | 54     | 194   | 15    |
| Mauritius                                | 46   | 188   | 12    | 54     | 192   | 15    |
| Maldives                                 | 47   | 194   | 12    | 54     | 195   | 15    |
| Malaysia                                 | 47   | 190   | 12    | 54     | 192   | 15    |
| Lao People's<br>Democratic Republic      | 46   | 197   | 12    | 54     | 195   | 15    |
| Indonesia                                | 50   | 199   | 13    | 58     | 198   | 16    |
| Cambodia                                 | 46   | 195   | 12    | 54     | 195   | 15    |
| Southeast Asia                           | 48   | 197   | 13    | 56     | 196   | 16    |
| Taiwan<br>(Province of China)            | 37   | 135   | 11    | 47     | 153   | 15    |
| Democratic People's<br>Republic of Korea | 39   | 142   | 12    | 45     | 150   | 13    |
| China                                    | 42   | 148   | 14    | 45     | 149   | 13    |
| East Asia                                | 42   | 148   | 14    | 45     | 150   | 13    |

**Table S7. The absolute numbers and rates of prevalence of migraine in different age groups in East Asia in 2019**

| Age   | Male (Numbers, 95% UI) |            |           | Female (Numbers, 95% UI) |            |            | Male (Rates, 95% UI) |        |        | Female (Rates, 95% UI) |        |        |
|-------|------------------------|------------|-----------|--------------------------|------------|------------|----------------------|--------|--------|------------------------|--------|--------|
|       | Mean                   | Upper      | Lower     | Mean                     | Upper      | Lower      | Mean                 | Upper  | Lower  | Mean                   | Upper  | Lower  |
| 5-9   | 466,115                | 722,970    | 289,172   | 734,664                  | 1,130,675  | 456,634    | 1,148                | 1,780  | 712    | 2,121                  | 3,265  | 1,318  |
| 10-14 | 2,298,328              | 3,223,550  | 1,589,882 | 3,498,872                | 4,971,196  | 2,436,923  | 5,790                | 8,121  | 4,005  | 10,406                 | 14,785 | 7,248  |
| 15-19 | 3,834,875              | 5,016,696  | 2,812,784 | 5,790,198                | 7,639,564  | 4,307,446  | 9,205                | 12,041 | 6,751  | 15,855                 | 20,919 | 11,795 |
| 20-24 | 4,889,755              | 6,258,933  | 3,769,455 | 7,535,790                | 9,494,079  | 5,870,987  | 10,964               | 14,034 | 8,452  | 18,457                 | 23,253 | 14,380 |
| 25-29 | 7,180,206              | 9,065,706  | 5,611,379 | 11,658,840               | 14,641,139 | 9,217,632  | 12,303               | 15,534 | 9,615  | 20,747                 | 26,055 | 16,403 |
| 30-34 | 8,775,644              | 11,122,255 | 6,867,461 | 14,664,408               | 18,331,663 | 11,693,894 | 13,058               | 16,549 | 10,219 | 22,380                 | 27,976 | 17,846 |
| 35-39 | 7,095,178              | 8,880,057  | 5,764,848 | 11,813,780               | 14,782,903 | 9,634,225  | 13,279               | 16,620 | 10,789 | 22,997                 | 28,776 | 18,754 |
| 40-44 | 7,267,138              | 9,081,246  | 5,893,698 | 12,218,918               | 15,186,758 | 9,892,081  | 13,506               | 16,878 | 10,954 | 23,676                 | 29,427 | 19,168 |
| 45-49 | 8,114,435              | 10,108,405 | 6,538,115 | 13,838,135               | 17,063,532 | 11,177,276 | 12,726               | 15,853 | 10,254 | 22,519                 | 27,768 | 18,189 |
| 50-54 | 7,624,489              | 9,403,004  | 6,064,456 | 13,493,373               | 16,664,686 | 10,783,003 | 11,777               | 14,524 | 9,367  | 21,018                 | 25,958 | 16,797 |
| 55-59 | 5,269,859              | 6,542,130  | 4,194,194 | 9,507,371                | 11,909,942 | 7,537,509  | 10,695               | 13,278 | 8,512  | 19,437                 | 24,349 | 15,410 |
| 60-64 | 3,811,994              | 4,780,865  | 3,015,005 | 6,938,916                | 8,687,059  | 5,380,918  | 9,335                | 11,708 | 7,384  | 17,089                 | 21,394 | 13,252 |
| 65-69 | 2,799,142              | 3,519,188  | 2,178,549 | 5,369,223                | 6,763,966  | 4,086,808  | 7,872                | 9,897  | 6,127  | 14,500                 | 18,266 | 11,037 |
| 70-74 | 1,537,127              | 1,981,783  | 1,203,215 | 3,038,611                | 3,906,118  | 2,333,620  | 6,412                | 8,266  | 5,019  | 11,960                 | 15,374 | 9,185  |
| 75-79 | 783,532                | 1,014,043  | 601,157   | 1,674,585                | 2,197,838  | 1,279,578  | 5,374                | 6,956  | 4,123  | 10,188                 | 13,371 | 7,785  |
| 80-84 | 407,508                | 519,289    | 313,302   | 1,016,487                | 1,316,293  | 772,907    | 4,716                | 6,010  | 3,626  | 9,079                  | 11,757 | 6,903  |
| 85-89 | 128,927                | 166,482    | 98,810    | 462,690                  | 601,125    | 353,534    | 4,148                | 5,357  | 3,179  | 8,006                  | 10,401 | 6,117  |
| 90-94 | 15,197                 | 19,959     | 11,740    | 125,527                  | 166,781    | 94,758     | 3,390                | 4,452  | 2,619  | 6,419                  | 8,528  | 4,845  |
| 95+   | 1,420                  | 1,921      | 1,047     | 20,914                   | 28,297     | 15,004     | 2,531                | 3,423  | 1,866  | 4,763                  | 6,444  | 3,417  |

**Table S8. The absolute numbers and rates of incidence of migraine in different age groups in East Asia in 2019**

| Age   | Male (Numbers, 95% UI) |         |         | Female (Numbers, 95% UI) |           |         | Male (Rates, 95% UI) |       |       | Female (Rates, 95% UI) |       |       |
|-------|------------------------|---------|---------|--------------------------|-----------|---------|----------------------|-------|-------|------------------------|-------|-------|
|       | Mean                   | Upper   | Lower   | Mean                     | Upper     | Lower   | Mean                 | Upper | Lower | Mean                   | Upper | Lower |
| 5-9   | 293,444                | 447,761 | 180,597 | 465,030                  | 709,815   | 288,193 | 723                  | 1,103 | 445   | 1,343                  | 2,049 | 832   |
| 10-14 | 500,723                | 666,257 | 348,936 | 739,563                  | 994,936   | 521,314 | 1,261                | 1,678 | 879   | 2,200                  | 2,959 | 1,550 |
| 15-19 | 421,925                | 605,093 | 279,140 | 612,160                  | 859,437   | 407,379 | 1,013                | 1,452 | 670   | 1,676                  | 2,353 | 1,115 |
| 20-24 | 425,074                | 636,864 | 269,746 | 657,491                  | 990,738   | 414,192 | 953                  | 1,428 | 605   | 1,610                  | 2,427 | 1,014 |
| 25-29 | 575,278                | 835,956 | 356,068 | 992,914                  | 1,457,031 | 618,566 | 986                  | 1,432 | 610   | 1,767                  | 2,593 | 1,101 |
| 30-34 | 598,655                | 856,004 | 391,180 | 1,075,309                | 1,557,309 | 713,232 | 891                  | 1,274 | 582   | 1,641                  | 2,377 | 1,088 |
| 35-39 | 473,267                | 671,660 | 305,771 | 844,362                  | 1,210,494 | 548,394 | 886                  | 1,257 | 572   | 1,644                  | 2,356 | 1,068 |
| 40-44 | 430,327                | 621,976 | 268,773 | 775,308                  | 1,118,217 | 479,875 | 800                  | 1,156 | 500   | 1,502                  | 2,167 | 930   |
| 45-49 | 394,985                | 562,033 | 251,505 | 704,147                  | 1,005,701 | 460,551 | 619                  | 881   | 394   | 1,146                  | 1,637 | 749   |
| 50-54 | 354,065                | 519,369 | 221,061 | 656,106                  | 971,764   | 401,574 | 547                  | 802   | 341   | 1,022                  | 1,514 | 626   |
| 55-59 | 203,783                | 295,663 | 130,070 | 379,617                  | 542,883   | 245,956 | 414                  | 600   | 264   | 776                    | 1,110 | 503   |
| 60-64 | 114,496                | 171,273 | 67,903  | 201,295                  | 303,118   | 120,879 | 280                  | 419   | 166   | 496                    | 747   | 298   |
| 65-69 | 73,789                 | 105,581 | 45,069  | 137,553                  | 203,090   | 81,373  | 208                  | 297   | 127   | 371                    | 548   | 220   |
| 70-74 | 44,388                 | 65,869  | 27,429  | 86,796                   | 126,972   | 54,360  | 185                  | 275   | 114   | 342                    | 500   | 214   |
| 75-79 | 29,154                 | 41,614  | 17,864  | 63,320                   | 90,643    | 38,779  | 200                  | 285   | 123   | 385                    | 551   | 236   |
| 80-84 | 17,163                 | 24,948  | 10,991  | 43,794                   | 64,127    | 28,461  | 199                  | 289   | 127   | 391                    | 573   | 254   |
| 85-89 | 4,688                  | 6,656   | 3,042   | 15,117                   | 21,724    | 9,502   | 151                  | 214   | 98    | 262                    | 376   | 164   |
| 90-94 | 373                    | 535     | 252     | 2,260                    | 3,252     | 1,513   | 83                   | 119   | 56    | 116                    | 166   | 77    |
| 95+   | 12                     | 17      | 8       | 127                      | 183       | 85      | 21                   | 30    | 14    | 29                     | 42    | 19    |

**Table S9. The absolute numbers and rates of YLDs of migraine in different age groups in East Asia in 2019**

| Age   | Male (Numbers, 95% UI) |         |        | Female (Numbers, 95% UI) |           |        | Male (Rates, 95% UI) |       |       | Female (Rates, 95% UI) |       |       |
|-------|------------------------|---------|--------|--------------------------|-----------|--------|----------------------|-------|-------|------------------------|-------|-------|
|       | Mean                   | Upper   | Lower  | Mean                     | Upper     | Lower  | Mean                 | Upper | Lower | Mean                   | Upper | Lower |
| 5-9   | 15,026                 | 41,840  | 477    | 24,368                   | 64,376    | 522    | 37                   | 103   | 1     | 70                     | 186   | 2     |
| 10-14 | 81,532                 | 201,413 | 4,596  | 126,479                  | 318,656   | 4,710  | 205                  | 507   | 12    | 376                    | 948   | 14    |
| 15-19 | 142,380                | 345,756 | 15,773 | 214,752                  | 552,742   | 16,034 | 342                  | 830   | 38    | 588                    | 1,514 | 44    |
| 20-24 | 185,125                | 435,496 | 27,450 | 279,515                  | 675,651   | 26,059 | 415                  | 976   | 62    | 685                    | 1,655 | 64    |
| 25-29 | 273,079                | 621,188 | 45,602 | 429,236                  | 1,032,409 | 39,984 | 468                  | 1,064 | 78    | 764                    | 1,837 | 71    |
| 30-34 | 336,701                | 764,355 | 58,124 | 539,136                  | 1,285,617 | 54,810 | 501                  | 1,137 | 86    | 823                    | 1,962 | 84    |
| 35-39 | 276,045                | 615,408 | 56,997 | 435,039                  | 1,034,376 | 47,444 | 517                  | 1,152 | 107   | 847                    | 2,014 | 92    |
| 40-44 | 285,152                | 619,633 | 67,974 | 450,684                  | 1,061,248 | 57,736 | 530                  | 1,152 | 126   | 873                    | 2,056 | 112   |
| 45-49 | 322,475                | 697,796 | 81,776 | 512,594                  | 1,215,112 | 72,849 | 506                  | 1,094 | 128   | 834                    | 1,977 | 119   |
| 50-54 | 304,726                | 664,413 | 74,002 | 500,391                  | 1,160,436 | 72,084 | 471                  | 1,026 | 114   | 779                    | 1,808 | 112   |
| 55-59 | 209,573                | 450,636 | 56,118 | 348,690                  | 809,788   | 51,331 | 425                  | 915   | 114   | 713                    | 1,656 | 105   |
| 60-64 | 153,708                | 332,154 | 43,058 | 254,420                  | 598,830   | 40,765 | 376                  | 813   | 105   | 627                    | 1,475 | 100   |
| 65-69 | 113,700                | 242,666 | 34,918 | 196,327                  | 451,467   | 34,515 | 320                  | 682   | 98    | 530                    | 1,219 | 93    |
| 70-74 | 60,812                 | 129,787 | 18,715 | 108,625                  | 257,122   | 20,123 | 254                  | 541   | 78    | 428                    | 1,012 | 79    |
| 75-79 | 29,845                 | 64,856  | 8,449  | 58,020                   | 139,709   | 10,648 | 205                  | 445   | 58    | 353                    | 850   | 65    |
| 80-84 | 15,027                 | 33,322  | 4,266  | 33,999                   | 80,180    | 6,008  | 174                  | 386   | 49    | 304                    | 716   | 54    |
| 85-89 | 4,637                  | 10,302  | 1,243  | 15,073                   | 35,581    | 2,637  | 149                  | 331   | 40    | 261                    | 616   | 46    |
| 90-94 | 522                    | 1,143   | 122    | 3,936                    | 9,208     | 621    | 116                  | 255   | 27    | 201                    | 471   | 32    |
| 95+   | 45                     | 107     | 6      | 606                      | 1,510     | 56     | 79                   | 190   | 12    | 138                    | 344   | 13    |

**Table S10. The absolute numbers and rates of prevalence of migraine in different age groups in Southeast Asia in 2019**

| Age   | Male (Numbers, 95% UI) |           |           | Female (Numbers, 95% UI) |           |           | Male (Rates, 95% UI) |        |        | Female (Rates, 95% UI) |        |        |
|-------|------------------------|-----------|-----------|--------------------------|-----------|-----------|----------------------|--------|--------|------------------------|--------|--------|
|       | Mean                   | Upper     | Lower     | Mean                     | Upper     | Lower     | Mean                 | Upper  | Lower  | Mean                   | Upper  | Lower  |
| 5-9   | 555,146                | 872,403   | 335,792   | 863,669                  | 1,345,330 | 526,888   | 1,900                | 2,985  | 1,149  | 3,136                  | 4,885  | 1,913  |
| 10-14 | 2,742,134              | 4,000,522 | 1,861,655 | 4,212,185                | 6,088,279 | 2,918,018 | 9,277                | 13,534 | 6,298  | 15,061                 | 21,769 | 10,433 |
| 15-19 | 4,020,284              | 5,355,485 | 2,951,581 | 6,228,689                | 8,109,666 | 4,668,351 | 13,919               | 18,541 | 10,219 | 22,417                 | 29,187 | 16,801 |
| 20-24 | 4,498,538              | 5,729,451 | 3,453,634 | 7,055,421                | 8,829,835 | 5,512,781 | 16,018               | 20,401 | 12,298 | 25,594                 | 32,031 | 19,998 |
| 25-29 | 4,866,461              | 6,141,382 | 3,782,995 | 7,657,417                | 9,569,078 | 6,036,151 | 17,563               | 22,164 | 13,653 | 27,988                 | 34,975 | 22,062 |
| 30-34 | 4,933,407              | 6,266,913 | 3,872,349 | 7,716,971                | 9,717,715 | 6,127,093 | 18,489               | 23,486 | 14,512 | 29,460                 | 37,098 | 23,391 |
| 35-39 | 4,861,421              | 6,123,098 | 3,909,612 | 7,621,869                | 9,391,321 | 6,200,304 | 18,800               | 23,679 | 15,119 | 29,926                 | 36,874 | 24,345 |
| 40-44 | 4,547,020              | 5,659,957 | 3,655,830 | 7,111,605                | 8,668,541 | 5,794,887 | 19,086               | 23,758 | 15,345 | 30,166                 | 36,770 | 24,580 |
| 45-49 | 3,861,167              | 4,817,708 | 3,031,858 | 6,103,103                | 7,484,136 | 4,851,871 | 17,946               | 22,392 | 14,091 | 28,312                 | 34,719 | 22,508 |
| 50-54 | 3,105,889              | 3,850,735 | 2,436,305 | 5,034,196                | 6,178,197 | 4,027,495 | 16,449               | 20,393 | 12,902 | 25,956                 | 31,855 | 20,766 |
| 55-59 | 2,344,971              | 2,938,907 | 1,840,411 | 3,927,608                | 4,893,029 | 3,122,926 | 14,772               | 18,513 | 11,593 | 23,367                 | 29,111 | 18,580 |
| 60-64 | 1,569,958              | 1,987,787 | 1,222,915 | 2,722,502                | 3,426,868 | 2,119,082 | 12,687               | 16,064 | 9,883  | 20,085                 | 25,281 | 15,633 |
| 65-69 | 894,007                | 1,131,870 | 672,558   | 1,630,337                | 2,078,895 | 1,253,881 | 10,512               | 13,308 | 7,908  | 16,683                 | 21,274 | 12,831 |
| 70-74 | 450,497                | 590,024   | 342,192   | 903,474                  | 1,193,177 | 686,229   | 8,472                | 11,096 | 6,435  | 13,573                 | 17,925 | 10,309 |
| 75-79 | 224,752                | 296,625   | 170,414   | 507,474                  | 675,835   | 381,987   | 7,005                | 9,246  | 5,312  | 11,308                 | 15,060 | 8,512  |
| 80-84 | 113,345                | 147,075   | 86,205    | 288,944                  | 376,779   | 214,341   | 6,055                | 7,857  | 4,605  | 9,884                  | 12,889 | 7,332  |
| 85-89 | 44,351                 | 57,545    | 33,465    | 125,496                  | 165,320   | 94,287    | 5,232                | 6,789  | 3,948  | 8,628                  | 11,367 | 6,483  |
| 90-94 | 12,197                 | 16,020    | 9,189     | 35,921                   | 47,538    | 26,825    | 4,231                | 5,558  | 3,188  | 6,983                  | 9,242  | 5,215  |
| 95+   | 2,321                  | 3,173     | 1,676     | 7,044                    | 9,764     | 4,980     | 3,168                | 4,330  | 2,288  | 5,295                  | 7,341  | 3,744  |

**Table S11. The absolute numbers and rates of incidence of migraine in different age groups in Southeast Asia in 2019**

| Age   | Male (Numbers, 95% UI) |         |         | Female (Numbers, 95% UI) |           |         | Male (Rates, 95% UI) |       |       | Female (Rates, 95% UI) |       |       |
|-------|------------------------|---------|---------|--------------------------|-----------|---------|----------------------|-------|-------|------------------------|-------|-------|
|       | Mean                   | Upper   | Lower   | Mean                     | Upper     | Lower   | Mean                 | Upper | Lower | Mean                   | Upper | Lower |
| 5-9   | 351,286                | 552,294 | 209,768 | 547,648                  | 848,458   | 327,708 | 1,202                | 1,890 | 718   | 1,989                  | 3,081 | 1,190 |
| 10-14 | 571,070                | 771,730 | 396,697 | 866,034                  | 1,152,946 | 604,475 | 1,932                | 2,611 | 1,342 | 3,097                  | 4,122 | 2,161 |
| 15-19 | 413,378                | 582,809 | 264,979 | 628,819                  | 886,031   | 402,190 | 1,431                | 2,018 | 917   | 2,263                  | 3,189 | 1,447 |
| 20-24 | 371,420                | 565,784 | 232,351 | 570,965                  | 850,953   | 355,665 | 1,323                | 2,015 | 827   | 2,071                  | 3,087 | 1,290 |
| 25-29 | 379,577                | 560,232 | 230,192 | 588,953                  | 866,247   | 365,890 | 1,370                | 2,022 | 831   | 2,153                  | 3,166 | 1,337 |
| 30-34 | 338,521                | 489,185 | 212,638 | 519,104                  | 745,043   | 333,682 | 1,269                | 1,833 | 797   | 1,982                  | 2,844 | 1,274 |
| 35-39 | 326,253                | 477,085 | 206,298 | 491,201                  | 711,185   | 310,470 | 1,262                | 1,845 | 798   | 1,929                  | 2,792 | 1,219 |
| 40-44 | 269,110                | 401,854 | 162,420 | 401,951                  | 583,862   | 243,133 | 1,130                | 1,687 | 682   | 1,705                  | 2,477 | 1,031 |
| 45-49 | 182,981                | 267,209 | 111,778 | 277,468                  | 401,781   | 175,564 | 850                  | 1,242 | 520   | 1,287                  | 1,864 | 814   |
| 50-54 | 137,794                | 208,972 | 82,573  | 212,773                  | 320,539   | 122,401 | 730                  | 1,107 | 437   | 1,097                  | 1,653 | 631   |
| 55-59 | 84,819                 | 126,694 | 51,576  | 131,740                  | 194,626   | 81,514  | 534                  | 798   | 325   | 784                    | 1,158 | 485   |
| 60-64 | 40,847                 | 63,483  | 23,028  | 63,556                   | 100,977   | 35,179  | 330                  | 513   | 186   | 469                    | 745   | 260   |
| 65-69 | 20,193                 | 30,295  | 11,857  | 33,849                   | 51,909    | 19,357  | 237                  | 356   | 139   | 346                    | 531   | 198   |
| 70-74 | 11,403                 | 17,514  | 6,504   | 21,406                   | 33,488    | 12,171  | 214                  | 329   | 122   | 322                    | 503   | 183   |
| 75-79 | 7,563                  | 11,114  | 4,471   | 16,527                   | 24,100    | 10,060  | 236                  | 346   | 139   | 368                    | 537   | 224   |
| 80-84 | 4,359                  | 6,552   | 2,632   | 10,849                   | 16,288    | 6,574   | 233                  | 350   | 141   | 371                    | 557   | 225   |
| 85-89 | 1,411                  | 2,095   | 853     | 3,603                    | 5,323     | 2,123   | 167                  | 247   | 101   | 248                    | 366   | 146   |
| 90-94 | 254                    | 383     | 165     | 596                      | 912       | 376     | 88                   | 133   | 57    | 116                    | 177   | 73    |
| 95+   | 16                     | 24      | 10      | 39                       | 60        | 24      | 22                   | 33    | 14    | 29                     | 45    | 18    |

**Table S12. The absolute numbers and rates of YLDs of migraine in different age groups in Southeast Asia in 2019**

| Age   | Male (Numbers, 95% UI) |         |        | Female (Numbers, 95% UI) |         |        | Male (Rates, 95% UI) |       |       | Female (Rates, 95% UI) |       |       |
|-------|------------------------|---------|--------|--------------------------|---------|--------|----------------------|-------|-------|------------------------|-------|-------|
|       | Mean                   | Upper   | Lower  | Mean                     | Upper   | Lower  | Mean                 | Upper | Lower | Mean                   | Upper | Lower |
| 5-9   | 18,426                 | 49,476  | 318    | 29,747                   | 79,826  | 376    | 63                   | 169   | 1     | 108                    | 290   | 1     |
| 10-14 | 99,191                 | 254,425 | 3,176  | 156,314                  | 416,314 | 4,491  | 336                  | 861   | 11    | 559                    | 1,489 | 16    |
| 15-19 | 149,210                | 386,832 | 10,982 | 235,467                  | 639,799 | 14,109 | 517                  | 1,339 | 38    | 847                    | 2,303 | 51    |
| 20-24 | 167,703                | 403,062 | 15,868 | 266,093                  | 689,286 | 19,595 | 597                  | 1,435 | 57    | 965                    | 2,500 | 71    |
| 25-29 | 181,021                | 431,243 | 20,292 | 286,895                  | 728,617 | 23,843 | 653                  | 1,556 | 73    | 1,049                  | 2,663 | 87    |
| 30-34 | 184,657                | 422,577 | 23,250 | 289,021                  | 701,169 | 27,650 | 692                  | 1,584 | 87    | 1,103                  | 2,677 | 106   |
| 35-39 | 183,559                | 425,582 | 25,104 | 285,868                  | 693,909 | 29,569 | 710                  | 1,646 | 97    | 1,122                  | 2,725 | 116   |
| 40-44 | 172,643                | 396,893 | 27,325 | 267,333                  | 653,780 | 33,477 | 725                  | 1,666 | 115   | 1,134                  | 2,773 | 142   |
| 45-49 | 147,174                | 343,681 | 26,189 | 230,046                  | 549,054 | 31,972 | 684                  | 1,597 | 122   | 1,067                  | 2,547 | 148   |
| 50-54 | 118,535                | 270,248 | 21,148 | 189,712                  | 450,484 | 26,775 | 628                  | 1,431 | 112   | 978                    | 2,323 | 138   |
| 55-59 | 88,359                 | 200,746 | 17,182 | 146,603                  | 355,761 | 22,080 | 557                  | 1,265 | 108   | 872                    | 2,117 | 131   |
| 60-64 | 59,273                 | 135,139 | 12,484 | 101,501                  | 239,066 | 16,511 | 479                  | 1,092 | 101   | 749                    | 1,764 | 122   |
| 65-69 | 33,708                 | 76,157  | 7,729  | 60,511                   | 142,880 | 10,888 | 396                  | 895   | 91    | 619                    | 1,462 | 111   |
| 70-74 | 16,529                 | 38,098  | 4,013  | 32,628                   | 77,360  | 6,215  | 311                  | 716   | 75    | 490                    | 1,162 | 93    |
| 75-79 | 7,969                  | 18,370  | 1,786  | 17,777                   | 42,334  | 3,078  | 248                  | 573   | 56    | 396                    | 943   | 69    |
| 80-84 | 3,920                  | 8,975   | 843    | 9,836                    | 23,539  | 1,759  | 209                  | 479   | 45    | 336                    | 805   | 60    |
| 85-89 | 1,515                  | 3,477   | 326    | 4,196                    | 9,944   | 736    | 179                  | 410   | 38    | 289                    | 684   | 51    |
| 90-94 | 404                    | 934     | 80     | 1,165                    | 2,751   | 192    | 140                  | 324   | 28    | 227                    | 535   | 37    |
| 95+   | 72                     | 174     | 9      | 213                      | 530     | 20     | 98                   | 238   | 12    | 160                    | 398   | 15    |

**Table S13. The absolute numbers and rates of prevalence of tension-type headache in different age groups in East Asia in 2019**

| Age   | Male (Numbers, 95% UI) |            |           | Female (Numbers, 95% UI) |            |            | Male (Rates, 95% UI) |        |        | Female (Rates, 95% UI) |        |        |
|-------|------------------------|------------|-----------|--------------------------|------------|------------|----------------------|--------|--------|------------------------|--------|--------|
|       | Mean                   | Upper      | Lower     | Mean                     | Upper      | Lower      | Mean                 | Upper  | Lower  | Mean                   | Upper  | Lower  |
| 5-9   | 2,546,021              | 3,673,939  | 1,658,950 | 2,346,293                | 3,345,088  | 1,509,299  | 6,269                | 9,046  | 4,085  | 6,774                  | 9,658  | 4,358  |
| 10-14 | 8,163,575              | 11,351,996 | 5,781,295 | 7,496,452                | 10,249,387 | 5,363,212  | 20,565               | 28,597 | 14,564 | 22,296                 | 30,483 | 15,951 |
| 15-19 | 8,654,900              | 12,074,370 | 5,617,703 | 8,537,076                | 11,930,381 | 5,698,700  | 20,774               | 28,981 | 13,484 | 23,376                 | 32,668 | 15,604 |
| 20-24 | 8,876,679              | 12,691,520 | 5,841,026 | 9,552,122                | 13,338,372 | 6,360,063  | 19,904               | 28,457 | 13,097 | 23,396                 | 32,669 | 15,577 |
| 25-29 | 12,180,920             | 17,052,513 | 8,378,168 | 14,190,918               | 19,790,305 | 9,888,717  | 20,872               | 29,219 | 14,356 | 25,253                 | 35,218 | 17,597 |
| 30-34 | 14,403,793             | 19,789,895 | 9,662,733 | 16,967,113               | 23,292,981 | 11,371,031 | 21,432               | 29,447 | 14,378 | 25,894                 | 35,548 | 17,353 |
| 35-39 | 12,987,956             | 17,851,083 | 9,119,514 | 15,028,667               | 20,346,303 | 10,754,419 | 24,308               | 33,409 | 17,068 | 29,255                 | 39,606 | 20,935 |
| 40-44 | 11,830,320             | 16,348,321 | 8,143,493 | 13,775,296               | 19,118,065 | 9,615,760  | 21,987               | 30,384 | 15,135 | 26,692                 | 37,045 | 18,632 |
| 45-49 | 10,926,427             | 15,767,811 | 7,437,759 | 12,603,012               | 17,958,948 | 8,441,057  | 17,136               | 24,729 | 11,665 | 20,509                 | 29,225 | 13,737 |
| 50-54 | 11,394,779             | 16,134,467 | 7,679,293 | 13,501,619               | 19,096,406 | 9,216,388  | 17,600               | 24,921 | 11,861 | 21,031                 | 29,746 | 14,356 |
| 55-59 | 7,202,417              | 10,120,378 | 4,845,167 | 8,774,497                | 11,975,238 | 6,025,135  | 14,618               | 20,540 | 9,833  | 17,939                 | 24,483 | 12,318 |
| 60-64 | 6,394,469              | 8,853,285  | 4,404,165 | 8,343,242                | 11,481,788 | 5,874,693  | 15,660               | 21,681 | 10,786 | 20,547                 | 28,277 | 14,468 |
| 65-69 | 6,862,207              | 9,508,723  | 4,521,862 | 9,433,558                | 13,174,555 | 6,243,234  | 19,298               | 26,741 | 12,716 | 25,476                 | 35,579 | 16,860 |
| 70-74 | 5,854,194              | 8,163,362  | 4,153,586 | 8,026,034                | 10,979,962 | 5,722,900  | 24,419               | 34,051 | 17,325 | 31,590                 | 43,217 | 22,525 |
| 75-79 | 3,477,862              | 4,797,495  | 2,392,248 | 4,945,170                | 6,724,431  | 3,422,351  | 23,856               | 32,907 | 16,409 | 30,085                 | 40,910 | 20,821 |
| 80-84 | 1,694,286              | 2,423,117  | 1,141,836 | 2,557,347                | 3,633,323  | 1,769,097  | 19,609               | 28,045 | 13,215 | 22,842                 | 32,452 | 15,801 |
| 85-89 | 593,014                | 859,612    | 388,555   | 1,182,520                | 1,699,276  | 791,142    | 19,081               | 27,659 | 12,502 | 20,462                 | 29,403 | 13,689 |
| 90-94 | 86,299                 | 125,784    | 56,599    | 413,017                  | 590,311    | 276,649    | 19,250               | 28,057 | 12,625 | 21,120                 | 30,185 | 14,146 |
| 95+   | 12,645                 | 18,495     | 8,371     | 107,845                  | 151,960    | 73,217     | 22,531               | 32,954 | 14,915 | 24,561                 | 34,607 | 16,674 |

**Table S14. The absolute numbers and rates of incidence of tension-type headache in different age groups in East Asia in 2019**

| Age   | Male (Numbers, 95% UI) |           |           | Female (Numbers, 95% UI) |           |           | Male (Rates, 95% UI) |        |       | Female (Rates, 95% UI) |        |       |
|-------|------------------------|-----------|-----------|--------------------------|-----------|-----------|----------------------|--------|-------|------------------------|--------|-------|
|       | Mean                   | Upper     | Lower     | Mean                     | Upper     | Lower     | Mean                 | Upper  | Lower | Mean                   | Upper  | Lower |
| 5-9   | 2,241,429              | 3,274,192 | 1,452,078 | 2,071,095                | 3,023,845 | 1,342,228 | 5,519                | 8,062  | 3,575 | 5,980                  | 8,731  | 3,875 |
| 10-14 | 3,273,075              | 4,483,231 | 2,241,062 | 3,033,181                | 4,144,579 | 2,141,332 | 8,245                | 11,294 | 5,646 | 9,021                  | 12,327 | 6,369 |
| 15-19 | 2,870,123              | 3,996,649 | 1,839,931 | 2,855,602                | 4,029,819 | 1,808,432 | 6,889                | 9,593  | 4,416 | 7,819                  | 11,034 | 4,952 |
| 20-24 | 3,181,409              | 4,386,544 | 2,037,940 | 3,437,525                | 4,726,333 | 2,230,055 | 7,133                | 9,836  | 4,570 | 8,419                  | 11,576 | 5,462 |
| 25-29 | 4,230,793              | 6,216,697 | 2,674,996 | 4,864,868                | 6,945,944 | 3,133,174 | 7,249                | 10,652 | 4,584 | 8,657                  | 12,361 | 5,576 |
| 30-34 | 5,465,268              | 7,710,331 | 3,313,848 | 6,287,760                | 8,945,068 | 3,766,226 | 8,132                | 11,473 | 4,931 | 9,596                  | 13,651 | 5,748 |
| 35-39 | 4,662,431              | 6,410,190 | 2,993,600 | 5,344,143                | 7,284,969 | 3,471,680 | 8,726                | 11,997 | 5,603 | 10,403                 | 14,181 | 6,758 |
| 40-44 | 3,478,628              | 5,006,090 | 2,176,741 | 3,980,234                | 5,672,569 | 2,556,235 | 6,465                | 9,304  | 4,046 | 7,712                  | 10,992 | 4,953 |
| 45-49 | 3,722,896              | 5,599,628 | 2,232,351 | 4,197,816                | 6,241,890 | 2,504,586 | 5,839                | 8,782  | 3,501 | 6,831                  | 10,158 | 4,076 |
| 50-54 | 3,697,219              | 5,538,132 | 2,425,019 | 4,286,856                | 6,106,177 | 2,758,847 | 5,711                | 8,554  | 3,746 | 6,678                  | 9,511  | 4,297 |
| 55-59 | 2,419,672              | 3,654,076 | 1,450,755 | 3,024,363                | 4,640,496 | 1,724,560 | 4,911                | 7,416  | 2,944 | 6,183                  | 9,487  | 3,526 |
| 60-64 | 2,404,261              | 3,668,881 | 1,420,896 | 3,138,530                | 4,842,472 | 1,867,251 | 5,888                | 8,985  | 3,480 | 7,729                  | 11,926 | 4,599 |
| 65-69 | 2,831,628              | 4,111,705 | 1,820,524 | 3,818,751                | 5,547,655 | 2,495,739 | 7,963                | 11,563 | 5,120 | 10,313                 | 14,982 | 6,740 |
| 70-74 | 2,224,839              | 3,064,177 | 1,477,594 | 2,968,622                | 4,045,842 | 1,975,191 | 9,280                | 12,781 | 6,163 | 11,684                 | 15,924 | 7,774 |
| 75-79 | 1,117,907              | 1,574,541 | 725,015   | 1,513,005                | 2,117,999 | 959,413   | 7,668                | 10,800 | 4,973 | 9,205                  | 12,885 | 5,837 |
| 80-84 | 561,165                | 825,528   | 342,108   | 769,466                  | 1,141,638 | 464,833   | 6,495                | 9,554  | 3,959 | 6,873                  | 10,197 | 4,152 |
| 85-89 | 203,196                | 286,017   | 129,718   | 395,707                  | 569,900   | 254,666   | 6,538                | 9,203  | 4,174 | 6,847                  | 9,861  | 4,407 |
| 90-94 | 31,384                 | 46,351    | 20,050    | 147,971                  | 215,140   | 93,416    | 7,000                | 10,339 | 4,472 | 7,566                  | 11,001 | 4,777 |
| 95+   | 4,513                  | 7,304     | 2,268     | 37,594                   | 60,854    | 19,896    | 8,041                | 13,014 | 4,042 | 8,562                  | 13,859 | 4,531 |

**Table S15. The absolute numbers and rates of YLDs of tension-type headache in different age groups in East Asia in 2019**

| Age   | Male (Numbers, 95% UI) |         |        | Female (Numbers, 95% UI) |         |        | Male (Rates, 95% UI) |       |       | Female (Rates, 95% UI) |       |       |
|-------|------------------------|---------|--------|--------------------------|---------|--------|----------------------|-------|-------|------------------------|-------|-------|
|       | Mean                   | Upper   | Lower  | Mean                     | Upper   | Lower  | Mean                 | Upper | Lower | Mean                   | Upper | Lower |
| 5-9   | 2,746                  | 16,372  | 83     | 2,651                    | 15,538  | 89     | 7                    | 40    | 0     | 8                      | 45    | 0     |
| 10-14 | 9,487                  | 66,256  | 851    | 9,172                    | 55,423  | 865    | 24                   | 167   | 2     | 27                     | 165   | 3     |
| 15-19 | 14,708                 | 79,715  | 3,100  | 14,793                   | 68,021  | 3,078  | 35                   | 191   | 7     | 41                     | 186   | 8     |
| 20-24 | 19,350                 | 78,908  | 5,273  | 19,514                   | 76,603  | 4,786  | 43                   | 177   | 12    | 48                     | 188   | 12    |
| 25-29 | 29,809                 | 111,785 | 8,151  | 30,556                   | 109,960 | 7,547  | 51                   | 192   | 14    | 54                     | 196   | 13    |
| 30-34 | 38,021                 | 129,300 | 10,736 | 38,560                   | 131,881 | 9,735  | 57                   | 192   | 16    | 59                     | 201   | 15    |
| 35-39 | 34,739                 | 121,413 | 9,851  | 34,326                   | 112,744 | 8,649  | 65                   | 227   | 18    | 67                     | 219   | 17    |
| 40-44 | 36,182                 | 112,727 | 11,567 | 35,396                   | 110,535 | 10,068 | 67                   | 210   | 21    | 69                     | 214   | 20    |
| 45-49 | 41,565                 | 109,499 | 14,738 | 40,749                   | 109,658 | 13,587 | 65                   | 172   | 23    | 66                     | 178   | 22    |
| 50-54 | 42,478                 | 114,886 | 14,322 | 43,584                   | 119,510 | 13,613 | 66                   | 177   | 22    | 68                     | 186   | 21    |
| 55-59 | 29,329                 | 70,498  | 10,401 | 30,087                   | 76,186  | 9,815  | 60                   | 143   | 21    | 62                     | 156   | 20    |
| 60-64 | 24,390                 | 59,872  | 8,268  | 25,637                   | 72,153  | 8,141  | 60                   | 147   | 20    | 63                     | 178   | 20    |
| 65-69 | 21,372                 | 58,733  | 6,952  | 24,338                   | 79,250  | 7,121  | 60                   | 165   | 20    | 66                     | 214   | 19    |
| 70-74 | 13,365                 | 44,066  | 3,476  | 16,149                   | 57,908  | 3,915  | 56                   | 184   | 14    | 64                     | 228   | 15    |
| 75-79 | 6,791                  | 23,197  | 1,694  | 8,860                    | 32,400  | 1,909  | 47                   | 159   | 12    | 54                     | 197   | 12    |
| 80-84 | 3,303                  | 11,458  | 814    | 4,801                    | 17,907  | 1,102  | 38                   | 133   | 9     | 43                     | 160   | 10    |
| 85-89 | 1,050                  | 3,914   | 238    | 2,126                    | 8,001   | 486    | 34                   | 126   | 8     | 37                     | 138   | 8     |
| 90-94 | 124                    | 592     | 22     | 599                      | 2,420   | 111    | 28                   | 132   | 5     | 31                     | 124   | 6     |
| 95+   | 13                     | 85      | 1      | 111                      | 606     | 9      | 23                   | 152   | 1     | 25                     | 138   | 2     |

**Table S16. The absolute numbers and rates of prevalence of tension-type headache in different age groups in Southeast Asia in 2019**

| Age   | Male (Numbers, 95% UI) |            |           | Female (Numbers, 95% UI) |            |           | Male (Rates, 95% UI) |        |        | Female (Rates, 95% UI) |        |        |
|-------|------------------------|------------|-----------|--------------------------|------------|-----------|----------------------|--------|--------|------------------------|--------|--------|
|       | Mean                   | Upper      | Lower     | Mean                     | Upper      | Lower     | Mean                 | Upper  | Lower  | Mean                   | Upper  | Lower  |
| 5-9   | 2,440,043              | 3,503,810  | 1,517,433 | 2,310,572                | 3,338,216  | 1,483,006 | 8,350                | 11,990 | 5,193  | 8,390                  | 12,121 | 5,385  |
| 10-14 | 8,091,983              | 11,097,580 | 5,673,004 | 7,805,765                | 10,678,592 | 5,521,730 | 27,376               | 37,544 | 19,192 | 27,910                 | 38,181 | 19,743 |
| 15-19 | 8,596,657              | 12,343,626 | 5,708,070 | 8,793,027                | 12,561,883 | 5,852,569 | 29,763               | 42,735 | 19,762 | 31,646                 | 45,210 | 21,063 |
| 20-24 | 8,462,176              | 11,922,651 | 5,584,973 | 9,090,508                | 12,652,713 | 6,048,669 | 30,132               | 42,454 | 19,887 | 32,976                 | 45,899 | 21,942 |
| 25-29 | 8,954,187              | 12,425,464 | 6,197,702 | 9,498,034                | 13,109,379 | 6,618,365 | 32,316               | 44,843 | 22,367 | 34,715                 | 47,914 | 24,190 |
| 30-34 | 8,782,311              | 12,011,433 | 5,836,204 | 9,073,837                | 12,290,494 | 6,120,089 | 32,913               | 45,015 | 21,872 | 34,640                 | 46,920 | 23,364 |
| 35-39 | 9,183,491              | 12,386,934 | 6,479,019 | 9,651,958                | 13,191,356 | 6,840,688 | 35,514               | 47,902 | 25,055 | 37,897                 | 51,794 | 26,859 |
| 40-44 | 7,646,834              | 10,407,094 | 5,164,019 | 8,244,341                | 11,237,812 | 5,706,962 | 32,098               | 43,684 | 21,676 | 34,970                 | 47,668 | 24,207 |
| 45-49 | 5,528,656              | 8,282,405  | 3,697,025 | 6,334,821                | 9,302,136  | 4,308,774 | 25,696               | 38,495 | 17,183 | 29,387                 | 43,152 | 19,988 |
| 50-54 | 5,004,313              | 7,077,096  | 3,365,987 | 5,968,650                | 8,401,676  | 4,013,271 | 26,502               | 37,480 | 17,826 | 30,774                 | 43,319 | 20,692 |
| 55-59 | 3,708,314              | 5,200,719  | 2,455,884 | 4,446,978                | 6,305,434  | 2,975,784 | 23,360               | 32,761 | 15,470 | 26,457                 | 37,514 | 17,704 |
| 60-64 | 3,241,672              | 4,464,082  | 2,294,639 | 3,954,078                | 5,434,785  | 2,779,037 | 26,197               | 36,076 | 18,544 | 29,170                 | 40,094 | 20,502 |
| 65-69 | 2,515,006              | 3,510,855  | 1,615,734 | 3,241,692                | 4,506,385  | 2,102,697 | 29,571               | 41,280 | 18,998 | 33,173                 | 46,115 | 21,517 |
| 70-74 | 1,849,900              | 2,528,940  | 1,308,211 | 2,570,868                | 3,471,171  | 1,868,079 | 34,788               | 47,558 | 24,602 | 38,623                 | 52,148 | 28,065 |
| 75-79 | 1,077,928              | 1,499,271  | 732,524   | 1,651,663                | 2,277,331  | 1,142,124 | 33,598               | 46,731 | 22,832 | 36,804                 | 50,746 | 25,450 |
| 80-84 | 506,319                | 741,233    | 328,017   | 831,156                  | 1,193,743  | 546,178   | 27,049               | 39,599 | 17,524 | 28,433                 | 40,836 | 18,684 |
| 85-89 | 218,259                | 325,840    | 138,322   | 381,592                  | 567,523    | 244,964   | 25,748               | 38,440 | 16,318 | 26,236                 | 39,020 | 16,843 |
| 90-94 | 77,021                 | 112,153    | 49,983    | 139,525                  | 204,562    | 91,447    | 26,719               | 38,907 | 17,340 | 27,125                 | 39,768 | 17,778 |
| 95+   | 22,705                 | 33,057     | 14,485    | 41,614                   | 61,384     | 26,029    | 30,988               | 45,117 | 19,769 | 31,285                 | 46,148 | 19,568 |

**Table S17. The absolute numbers and rates of incidence of tension-type headache in different age groups in Southeast Asia in 2019**

| Age   | Male (Numbers, 95% UI) |           |           | Female (Numbers, 95% UI) |           |           | Male (Rates, 95% UI) |        |       | Female (Rates, 95% UI) |        |       |
|-------|------------------------|-----------|-----------|--------------------------|-----------|-----------|----------------------|--------|-------|------------------------|--------|-------|
|       | Mean                   | Upper     | Lower     | Mean                     | Upper     | Lower     | Mean                 | Upper  | Lower | Mean                   | Upper  | Lower |
| 5-9   | 2,150,473              | 3,133,528 | 1,366,895 | 2,034,502                | 2,966,949 | 1,310,648 | 7,359                | 10,723 | 4,678 | 7,388                  | 10,773 | 4,759 |
| 10-14 | 3,236,541              | 4,501,996 | 2,199,207 | 3,167,147                | 4,463,803 | 2,163,197 | 10,949               | 15,231 | 7,440 | 11,324                 | 15,960 | 7,735 |
| 15-19 | 2,797,885              | 3,932,215 | 1,750,172 | 2,949,772                | 4,251,433 | 1,887,102 | 9,687                | 13,614 | 6,059 | 10,616                 | 15,301 | 6,792 |
| 20-24 | 2,903,843              | 3,955,248 | 1,921,501 | 3,139,092                | 4,251,264 | 2,050,560 | 10,340               | 14,084 | 6,842 | 11,387                 | 15,422 | 7,439 |
| 25-29 | 2,957,756              | 4,199,136 | 1,942,620 | 3,094,963                | 4,433,582 | 2,042,016 | 10,675               | 15,155 | 7,011 | 11,312                 | 16,205 | 7,463 |
| 30-34 | 3,064,828              | 4,357,001 | 1,855,786 | 3,168,809                | 4,468,566 | 1,881,324 | 11,486               | 16,329 | 6,955 | 12,097                 | 17,059 | 7,182 |
| 35-39 | 3,065,987              | 4,156,231 | 1,959,706 | 3,222,454                | 4,373,464 | 2,048,692 | 11,857               | 16,073 | 7,578 | 12,653                 | 17,172 | 8,044 |
| 40-44 | 2,127,132              | 3,044,151 | 1,346,172 | 2,317,972                | 3,288,553 | 1,473,113 | 8,929                | 12,778 | 5,651 | 9,832                  | 13,949 | 6,249 |
| 45-49 | 1,787,986              | 2,701,056 | 1,094,613 | 2,080,969                | 3,040,330 | 1,299,963 | 8,310                | 12,554 | 5,088 | 9,654                  | 14,104 | 6,030 |
| 50-54 | 1,541,613              | 2,201,980 | 999,390   | 1,804,184                | 2,531,714 | 1,199,297 | 8,164                | 11,662 | 5,293 | 9,302                  | 13,053 | 6,184 |
| 55-59 | 1,250,413              | 1,893,447 | 739,585   | 1,457,199                | 2,217,410 | 864,471   | 7,877                | 11,927 | 4,659 | 8,669                  | 13,192 | 5,143 |
| 60-64 | 1,138,125              | 1,713,605 | 671,961   | 1,386,695                | 2,118,231 | 813,291   | 9,198                | 13,848 | 5,430 | 10,230                 | 15,627 | 6,000 |
| 65-69 | 941,790                | 1,391,886 | 612,558   | 1,207,340                | 1,739,421 | 792,301   | 11,074               | 16,366 | 7,202 | 12,355                 | 17,800 | 8,108 |
| 70-74 | 655,895                | 904,313   | 431,556   | 904,112                  | 1,213,589 | 590,304   | 12,335               | 17,006 | 8,116 | 13,583                 | 18,232 | 8,868 |
| 75-79 | 320,529                | 450,616   | 201,163   | 482,241                  | 666,471   | 314,190   | 9,991                | 14,045 | 6,270 | 10,746                 | 14,851 | 7,001 |
| 80-84 | 151,169                | 222,043   | 92,393    | 240,546                  | 352,490   | 145,896   | 8,076                | 11,862 | 4,936 | 8,229                  | 12,058 | 4,991 |
| 85-89 | 69,536                 | 100,892   | 43,356    | 120,823                  | 174,855   | 75,506    | 8,203                | 11,902 | 5,115 | 8,307                  | 12,022 | 5,191 |
| 90-94 | 26,070                 | 37,532    | 16,339    | 47,145                   | 68,711    | 29,811    | 9,044                | 13,020 | 5,668 | 9,165                  | 13,358 | 5,795 |
| 95+   | 7,546                  | 12,274    | 3,392     | 13,698                   | 22,764    | 5,768     | 10,298               | 16,752 | 4,630 | 10,298                 | 17,114 | 4,336 |

**Table S18. The absolute numbers and rates of YLDs of tension-type headache in different age groups in Southeast Asia in 2019**

| Age   | Male (Numbers, 95% UI) |        |       | Female (Numbers, 95% UI) |        |       | Male (Rates, 95% UI) |       |       | Female (Rates, 95% UI) |       |       |
|-------|------------------------|--------|-------|--------------------------|--------|-------|----------------------|-------|-------|------------------------|-------|-------|
|       | Mean                   | Upper  | Lower | Mean                     | Upper  | Lower | Mean                 | Upper | Lower | Mean                   | Upper | Lower |
| 5-9   | 2,561                  | 15,717 | 55    | 2,550                    | 15,449 | 68    | 9                    | 54    | 0     | 9                      | 56    | 0     |
| 10-14 | 8,921                  | 67,609 | 637   | 9,319                    | 56,617 | 817   | 30                   | 229   | 2     | 33                     | 202   | 3     |
| 15-19 | 12,545                 | 71,543 | 2,024 | 14,268                   | 69,335 | 2,674 | 43                   | 248   | 7     | 51                     | 250   | 10    |
| 20-24 | 14,375                 | 68,862 | 2,993 | 16,670                   | 71,125 | 3,731 | 51                   | 245   | 11    | 60                     | 258   | 14    |
| 25-29 | 16,574                 | 74,845 | 3,587 | 18,866                   | 74,595 | 4,151 | 60                   | 270   | 13    | 69                     | 273   | 15    |
| 30-34 | 17,622                 | 70,773 | 4,033 | 19,589                   | 67,652 | 4,674 | 66                   | 265   | 15    | 75                     | 258   | 18    |
| 35-39 | 19,106                 | 76,455 | 4,634 | 21,446                   | 71,387 | 5,461 | 74                   | 296   | 18    | 84                     | 280   | 21    |
| 40-44 | 17,835                 | 63,675 | 4,814 | 20,493                   | 65,056 | 5,644 | 75                   | 267   | 20    | 87                     | 276   | 24    |
| 45-49 | 15,367                 | 47,522 | 4,823 | 18,444                   | 51,732 | 5,726 | 71                   | 221   | 22    | 86                     | 240   | 27    |
| 50-54 | 13,691                 | 44,780 | 3,968 | 16,911                   | 49,144 | 4,938 | 73                   | 237   | 21    | 87                     | 253   | 25    |
| 55-59 | 10,444                 | 31,347 | 3,212 | 13,234                   | 36,298 | 4,173 | 66                   | 197   | 20    | 79                     | 216   | 25    |
| 60-64 | 8,332                  | 25,464 | 2,469 | 10,870                   | 33,377 | 3,162 | 67                   | 206   | 20    | 80                     | 246   | 23    |
| 65-69 | 5,709                  | 19,406 | 1,524 | 7,880                    | 27,110 | 2,132 | 67                   | 228   | 18    | 81                     | 277   | 22    |
| 70-74 | 3,358                  | 12,383 | 735   | 5,019                    | 18,564 | 1,180 | 63                   | 233   | 14    | 75                     | 279   | 18    |
| 75-79 | 1,700                  | 6,673  | 322   | 2,844                    | 10,961 | 587   | 53                   | 208   | 10    | 63                     | 244   | 13    |
| 80-84 | 808                    | 3,161  | 161   | 1,479                    | 5,830  | 330   | 43                   | 169   | 9     | 51                     | 199   | 11    |
| 85-89 | 326                    | 1,376  | 58    | 649                      | 2,552  | 133   | 38                   | 162   | 7     | 45                     | 175   | 9     |
| 90-94 | 97                     | 522    | 13    | 196                      | 823    | 35    | 34                   | 181   | 5     | 38                     | 160   | 7     |
| 95+   | 22                     | 154    | 1     | 43                       | 253    | 3     | 30                   | 211   | 1     | 33                     | 190   | 2     |

**Table S19. The ratio of male to female prevalence, incidence, and YLDs rates of migraine according to different age groups in East Asia**

| Age   | Prevalence |          | Incidence |          | YLDs     |          |
|-------|------------|----------|-----------|----------|----------|----------|
|       | 1990       | 2019     | 1990      | 2019     | 1990     | 2019     |
| 5-9   | 0.525033   | 0.541079 | 0.521988  | 0.538146 | 0.51172  | 0.525877 |
| 10-14 | 0.54059    | 0.556379 | 0.561129  | 0.573468 | 0.531829 | 0.546005 |
| 15-19 | 0.56815    | 0.580556 | 0.598542  | 0.604167 | 0.571877 | 0.581161 |
| 20-24 | 0.583187   | 0.594026 | 0.575123  | 0.591863 | 0.599892 | 0.606327 |
| 25-29 | 0.579533   | 0.592992 | 0.546223  | 0.557871 | 0.604227 | 0.612575 |
| 30-34 | 0.570525   | 0.583471 | 0.530935  | 0.54281  | 0.602111 | 0.608907 |
| 35-39 | 0.56196    | 0.577432 | 0.517303  | 0.538895 | 0.601661 | 0.610068 |
| 40-44 | 0.554753   | 0.570452 | 0.528115  | 0.532368 | 0.598831 | 0.606867 |
| 45-49 | 0.554522   | 0.56511  | 0.539126  | 0.540591 | 0.60301  | 0.606283 |
| 50-54 | 0.552461   | 0.560306 | 0.530599  | 0.535112 | 0.605859 | 0.603859 |
| 55-59 | 0.549384   | 0.550253 | 0.546486  | 0.5329   | 0.603606 | 0.596649 |
| 60-64 | 0.55116    | 0.546278 | 0.567412  | 0.5656   | 0.609006 | 0.600757 |
| 65-69 | 0.553606   | 0.542887 | 0.571058  | 0.558619 | 0.617853 | 0.603081 |
| 70-74 | 0.553532   | 0.536097 | 0.555217  | 0.541968 | 0.614943 | 0.59329  |
| 75-79 | 0.547993   | 0.527539 | 0.521804  | 0.519106 | 0.608987 | 0.579966 |
| 80-84 | 0.541822   | 0.519484 | 0.533161  | 0.507827 | 0.601356 | 0.572702 |
| 85-89 | 0.542843   | 0.518145 | 0.603551  | 0.576724 | 0.602219 | 0.572015 |
| 90-94 | 0.551168   | 0.528105 | 0.720106  | 0.72044  | 0.605318 | 0.578737 |
| 95+   | 0.550461   | 0.531293 | 0.715406  | 0.714931 | 0.594522 | 0.575604 |

**Table S20. The ratio of male to female prevalence, incidence, and YLDs rates of migraine according to different age groups in Southeast Asia**

| Age   | Prevalence |          | Incidence |          | YLDs     |          |
|-------|------------|----------|-----------|----------|----------|----------|
|       | 1990       | 2019     | 1990      | 2019     | 1990     | 2019     |
| 5-9   | 0.59123    | 0.605771 | 0.590343  | 0.604516 | 0.56624  | 0.583785 |
| 10-14 | 0.600138   | 0.615961 | 0.611234  | 0.623916 | 0.582566 | 0.600409 |
| 15-19 | 0.603283   | 0.620899 | 0.622919  | 0.632387 | 0.592079 | 0.609578 |
| 20-24 | 0.606928   | 0.625854 | 0.632421  | 0.638528 | 0.599382 | 0.618632 |
| 25-29 | 0.607944   | 0.627528 | 0.632194  | 0.636386 | 0.60285  | 0.623028 |
| 30-34 | 0.607828   | 0.627578 | 0.638919  | 0.640175 | 0.607532 | 0.627199 |
| 35-39 | 0.609262   | 0.628207 | 0.655892  | 0.654178 | 0.613139 | 0.632427 |
| 40-44 | 0.614862   | 0.632713 | 0.665418  | 0.662526 | 0.621706 | 0.639062 |
| 45-49 | 0.617067   | 0.633863 | 0.6637    | 0.660724 | 0.62464  | 0.64098  |
| 50-54 | 0.617869   | 0.633706 | 0.670311  | 0.665191 | 0.624733 | 0.64178  |
| 55-59 | 0.616774   | 0.632158 | 0.686579  | 0.681699 | 0.622378 | 0.638152 |
| 60-64 | 0.617985   | 0.631697 | 0.705486  | 0.704033 | 0.627585 | 0.639698 |
| 65-69 | 0.61875    | 0.630066 | 0.687766  | 0.685478 | 0.629424 | 0.640053 |
| 70-74 | 0.614952   | 0.624164 | 0.669164  | 0.666828 | 0.625951 | 0.634121 |
| 75-79 | 0.609965   | 0.619491 | 0.644087  | 0.640058 | 0.620493 | 0.627046 |
| 80-84 | 0.605594   | 0.612609 | 0.630864  | 0.627448 | 0.619129 | 0.622373 |
| 85-89 | 0.604115   | 0.606385 | 0.672306  | 0.672099 | 0.619953 | 0.619438 |
| 90-94 | 0.600849   | 0.605906 | 0.762265  | 0.760355 | 0.614547 | 0.618832 |
| 95+   | 0.593757   | 0.59827  | 0.756931  | 0.755089 | 0.604358 | 0.61093  |

**Table S21. The ratio of male to female prevalence, incidence, and YLDs rates of tension-type headache according to different age groups in East Asia**

| Age   | Prevalence |          | Incidence |          | YLDs     |          |
|-------|------------|----------|-----------|----------|----------|----------|
|       | 1990       | 2019     | 1990      | 2019     | 1990     | 2019     |
| 5-9   | 0.925918   | 0.925413 | 0.927692  | 0.922955 | 0.885337 | 0.883637 |
| 10-14 | 0.921362   | 0.922384 | 0.918841  | 0.913997 | 0.869742 | 0.876132 |
| 15-19 | 0.88391    | 0.888668 | 0.861978  | 0.881027 | 0.849591 | 0.871522 |
| 20-24 | 0.834832   | 0.850742 | 0.822337  | 0.847268 | 0.885185 | 0.90779  |
| 25-29 | 0.808705   | 0.826489 | 0.811452  | 0.837372 | 0.910996 | 0.939315 |
| 30-34 | 0.794964   | 0.827702 | 0.800352  | 0.847462 | 0.924451 | 0.961372 |
| 35-39 | 0.789861   | 0.830896 | 0.801703  | 0.838805 | 0.939438 | 0.973002 |
| 40-44 | 0.789394   | 0.823728 | 0.795277  | 0.838277 | 0.94801  | 0.980456 |
| 45-49 | 0.801145   | 0.835519 | 0.82975   | 0.854692 | 0.958897 | 0.983021 |
| 50-54 | 0.825097   | 0.836865 | 0.827582  | 0.855208 | 0.950418 | 0.966442 |
| 55-59 | 0.791376   | 0.814855 | 0.784514  | 0.794231 | 0.942323 | 0.967696 |
| 60-64 | 0.760867   | 0.762119 | 0.744835  | 0.761743 | 0.910708 | 0.945998 |
| 65-69 | 0.733154   | 0.757502 | 0.753395  | 0.772166 | 0.877252 | 0.914443 |
| 70-74 | 0.762699   | 0.772992 | 0.79777   | 0.794241 | 0.857188 | 0.877053 |
| 75-79 | 0.795912   | 0.792932 | 0.843717  | 0.833048 | 0.863474 | 0.864193 |
| 80-84 | 0.869828   | 0.858489 | 0.956596  | 0.945015 | 0.898428 | 0.891402 |
| 85-89 | 0.946517   | 0.932513 | 0.974351  | 0.954859 | 0.93276  | 0.900082 |
| 90-94 | 0.945812   | 0.911457 | 0.946401  | 0.925187 | 0.930757 | 0.91833  |
| 95+   | 0.94301    | 0.917379 | 0.947815  | 0.939197 | 0.948804 | 0.921466 |

**Table S22. The ratio of male to female prevalence, incidence, and YLDs rates of tension-type headache according to different age groups in Southeast Asia**

| Age   | Prevalence |          | Incidence |          | YLDs     |          |
|-------|------------|----------|-----------|----------|----------|----------|
|       | 1990       | 2019     | 1990      | 2019     | 1990     | 2019     |
| 5-9   | 0.995364   | 0.995236 | 0.996323  | 0.996148 | 0.944607 | 0.946605 |
| 10-14 | 0.980545   | 0.98087  | 0.96659   | 0.966908 | 0.906314 | 0.905778 |
| 15-19 | 0.93914    | 0.940486 | 0.911724  | 0.912436 | 0.844719 | 0.845773 |
| 20-24 | 0.912103   | 0.913732 | 0.907434  | 0.908017 | 0.843437 | 0.84642  |
| 25-29 | 0.930149   | 0.930882 | 0.943373  | 0.943646 | 0.866158 | 0.867505 |
| 30-34 | 0.950075   | 0.950136 | 0.949579  | 0.949462 | 0.879685 | 0.883086 |
| 35-39 | 0.937664   | 0.937116 | 0.938097  | 0.937097 | 0.878415 | 0.87746  |
| 40-44 | 0.917352   | 0.917853 | 0.907928  | 0.9081   | 0.862185 | 0.861208 |
| 45-49 | 0.872086   | 0.874405 | 0.859578  | 0.860847 | 0.835212 | 0.834727 |
| 50-54 | 0.858854   | 0.861193 | 0.877182  | 0.877661 | 0.829615 | 0.831567 |
| 55-59 | 0.881552   | 0.882933 | 0.908113  | 0.908555 | 0.834948 | 0.835523 |
| 60-64 | 0.89694    | 0.898076 | 0.897605  | 0.899079 | 0.837519 | 0.839726 |
| 65-69 | 0.891075   | 0.891434 | 0.896106  | 0.896285 | 0.832296 | 0.832446 |
| 70-74 | 0.901849   | 0.900722 | 0.9095    | 0.908101 | 0.837725 | 0.837599 |
| 75-79 | 0.914318   | 0.912879 | 0.932774  | 0.929712 | 0.839549 | 0.836136 |
| 80-84 | 0.953187   | 0.951342 | 0.984928  | 0.98143  | 0.856449 | 0.853367 |
| 85-89 | 0.982992   | 0.981395 | 0.994454  | 0.987488 | 0.865645 | 0.860392 |
| 90-94 | 0.987271   | 0.985062 | 0.994377  | 0.98675  | 0.882662 | 0.883191 |
| 95+   | 0.991731   | 0.990507 | 1.004476  | 1.000079 | 0.931986 | 0.929518 |

**Table S23. The differences of age standardized prevalence rates of migraine between East Asia, Southeast Asia, and other regions from 1990 to 2019**

| Year | Global   | East Asia | Southeast Asia | High SDI | High-middle SDI | Middle SDI | Low-middle SDI | Low SDI  |
|------|----------|-----------|----------------|----------|-----------------|------------|----------------|----------|
| 1990 | 13865.65 | 10819.48  | 16220.17       | 15323.7  | 13502.79        | 13409.66   | 14190.41       | 12873.88 |
| 1991 | 13864.35 | 10818.56  | 16218.37       | 15332.91 | 13484.96        | 13424.72   | 14190.12       | 12872.09 |
| 1992 | 13863.73 | 10817.88  | 16215.58       | 15337.23 | 13471.57        | 13439.7    | 14190.15       | 12876.49 |
| 1993 | 13862.2  | 10817.57  | 16211.73       | 15334.52 | 13460.41        | 13454.69   | 14190.27       | 12878.71 |
| 1994 | 13859.15 | 10817.54  | 16206.95       | 15323.56 | 13450.03        | 13470.17   | 14190.68       | 12874.42 |
| 1995 | 13855.15 | 10818.28  | 16201.59       | 15303.64 | 13440.95        | 13486.31   | 14191.35       | 12869.51 |
| 1996 | 13841.42 | 10803.07  | 16169.05       | 15265.42 | 13438.93        | 13484.19   | 14179.06       | 12857.1  |
| 1997 | 13815.01 | 10765.12  | 16099.67       | 15210.19 | 13447.86        | 13456.33   | 14148.84       | 12837.52 |
| 1998 | 13784.63 | 10720.05  | 16018.8        | 15150.13 | 13459.99        | 13419.88   | 14113.31       | 12817.4  |
| 1999 | 13759.97 | 10683.26  | 15951.03       | 15100.41 | 13469.04        | 13392.89   | 14085.19       | 12801.51 |
| 2000 | 13750.37 | 10670.66  | 15920.03       | 15073.88 | 13471.06        | 13392.45   | 14077.04       | 12796.61 |
| 2001 | 13764.57 | 10729.25  | 15915.17       | 15057.71 | 13488.08        | 13436.38   | 14088.18       | 12798.61 |
| 2002 | 13797.31 | 10863.62  | 15910.4        | 15036.1  | 13535.55        | 13516.35   | 14105.97       | 12799.79 |
| 2003 | 13837.68 | 11026.34  | 15905.81       | 15015.5  | 13595.62        | 13610.05   | 14125.79       | 12799.83 |
| 2004 | 13874.68 | 11169.79  | 15901.66       | 15000.17 | 13650.27        | 13695.36   | 14143.17       | 12800.13 |
| 2005 | 13896.65 | 11246.75  | 15897.7        | 14997.67 | 13680.49        | 13749.45   | 14153.37       | 12801.29 |
| 2006 | 13910.94 | 11276.08  | 15896.52       | 15013.73 | 13693.31        | 13782.92   | 14158.69       | 12803.98 |
| 2007 | 13929.52 | 11305.56  | 15899.06       | 15043.87 | 13708.96        | 13818.65   | 14164.19       | 12809.95 |
| 2008 | 13947.77 | 11331.25  | 15901.3        | 15076.66 | 13725.01        | 13851.33   | 14169.37       | 12816.99 |
| 2009 | 13962.61 | 11349.43  | 15901.18       | 15107.06 | 13737.8         | 13878.84   | 14173.73       | 12823.41 |
| 2010 | 13971.36 | 11356.49  | 15898.8        | 15128.48 | 13743.64        | 13901.16   | 14176.56       | 12828.1  |
| 2011 | 13975.37 | 11356.66  | 15894.99       | 15164.75 | 13747.46        | 13915.44   | 14168.09       | 12825.2  |

|      |          |          |          |          |          |          |          |          |
|------|----------|----------|----------|----------|----------|----------|----------|----------|
| 2012 | 13977.9  | 11356.16 | 15891.15 | 15235.96 | 13754.7  | 13922.53 | 14145.58 | 12815.06 |
| 2013 | 13979.31 | 11354.96 | 15887.22 | 15317.45 | 13763.07 | 13926.22 | 14118.56 | 12803.19 |
| 2014 | 13980.04 | 11353.25 | 15883.26 | 15384.39 | 13769.7  | 13931.17 | 14096.37 | 12793.12 |
| 2015 | 13980.27 | 11351.61 | 15879.42 | 15411.27 | 13771.83 | 13941.37 | 14088.32 | 12789.09 |
| 2016 | 13972.64 | 11350.38 | 15875.59 | 15360.46 | 13757.43 | 13956.02 | 14093.28 | 12789.48 |
| 2017 | 13965.19 | 11348.88 | 15871.85 | 15314.75 | 13742.36 | 13969.68 | 14098.95 | 12788.2  |
| 2018 | 14009.07 | 11448.82 | 15868.14 | 15331.71 | 13785.7  | 14034.8  | 14163.91 | 12810.2  |
| 2019 | 14107.26 | 11670.59 | 15864.45 | 15378.66 | 13887.67 | 14162.55 | 14301.48 | 12860.96 |

**Table S24. The differences of age standardized prevalence rates of tension-type headache between East Asia, Southeast Asia, and other regions from 1990 to 2019**

| Year | Global   | East Asia | Southeast Asia | High SDI | High-middle SDI | Middle SDI | Low-middle SDI | Low SDI  |
|------|----------|-----------|----------------|----------|-----------------|------------|----------------|----------|
| 1990 | 25306.23 | 17534.57  | 25853.96       | 31578.38 | 25348           | 22426.95   | 24868.64       | 23984.45 |
| 1991 | 25282.1  | 17539.34  | 25853.86       | 31521.28 | 25316.83        | 22452.7    | 24880.57       | 23985.77 |
| 1992 | 25256.07 | 17540.71  | 25853.85       | 31473.27 | 25277.08        | 22475.73   | 24883.41       | 23985.61 |
| 1993 | 25228.23 | 17539.3   | 25853.87       | 31433.78 | 25229.84        | 22497.1    | 24879.54       | 23982.41 |
| 1994 | 25198.29 | 17535.97  | 25853.92       | 31402.2  | 25174.22        | 22517.45   | 24870.44       | 23973.23 |
| 1995 | 25169.12 | 17531.38  | 25853.85       | 31376.85 | 25115.47        | 22539.65   | 24859.3        | 23960.82 |
| 1996 | 25115.57 | 17480.47  | 25853.95       | 31364.72 | 25011.79        | 22535.5    | 24814.31       | 23930.16 |
| 1997 | 25031.88 | 17370.63  | 25853.79       | 31367.39 | 24853.66        | 22497.58   | 24724.37       | 23877.61 |
| 1998 | 24940.06 | 17252.46  | 25853.49       | 31374.15 | 24680.81        | 22452.14   | 24620.95       | 23819.89 |
| 1999 | 24863.83 | 17176.26  | 25853.24       | 31377.66 | 24533.24        | 22426.38   | 24534.59       | 23770.84 |
| 2000 | 24829.63 | 17193.09  | 25853.23       | 31367.63 | 24456.77        | 22450.59   | 24496.35       | 23745.33 |
| 2001 | 24843.14 | 17367.37  | 25852.94       | 31317.43 | 24472.93        | 22547.87   | 24507.78       | 23721.16 |
| 2002 | 24886.44 | 17668.33  | 25852.5        | 31224.23 | 24557.98        | 22698.58   | 24541.14       | 23678.17 |
| 2003 | 24938.87 | 18004.48  | 25852.15       | 31116.27 | 24666.65        | 22863.96   | 24582.86       | 23630.82 |
| 2004 | 24981.82 | 18284.34  | 25852.07       | 31020.04 | 24754.62        | 23006.63   | 24620.99       | 23591.75 |
| 2005 | 24996.51 | 18416.89  | 25852.44       | 30962.6  | 24778.35        | 23090.14   | 24643          | 23572.69 |
| 2006 | 24988.41 | 18435.06  | 25852.16       | 30939.38 | 24749.29        | 23127.4    | 24651.83       | 23569.55 |
| 2007 | 24979.35 | 18436.96  | 25851.22       | 30924.88 | 24717.27        | 23157.68   | 24659.12       | 23568.13 |
| 2008 | 24969.03 | 18429.83  | 25852.49       | 30910.92 | 24683.69        | 23182.7    | 24665.54       | 23566.86 |
| 2009 | 24958.28 | 18420.13  | 25855.74       | 30898.75 | 24649.84        | 23205.95   | 24672.06       | 23565.59 |
| 2010 | 24948.26 | 18415.31  | 25857.76       | 30887.82 | 24619.37        | 23232.71   | 24679.3        | 23563.45 |
| 2011 | 24939.32 | 18415.05  | 25858.17       | 30875.13 | 24596.19        | 23260.29   | 24686.1        | 23559.24 |

|      |          |          |          |          |          |          |          |          |
|------|----------|----------|----------|----------|----------|----------|----------|----------|
| 2012 | 24931.53 | 18414.61 | 25858.43 | 30871.62 | 24581.88 | 23285.29 | 24691.4  | 23553.94 |
| 2013 | 24924.56 | 18414.27 | 25858.64 | 30875.97 | 24570.91 | 23308.3  | 24695.82 | 23548.45 |
| 2014 | 24918.67 | 18413.68 | 25858.95 | 30885.29 | 24559.56 | 23331.62 | 24700.32 | 23543.62 |
| 2015 | 24912.75 | 18413.39 | 25859.6  | 30895.74 | 24543.3  | 23356.81 | 24705.7  | 23539.56 |
| 2016 | 24908.54 | 18413.13 | 25859.91 | 30920.74 | 24529.17 | 23381.39 | 24709.98 | 23532.11 |
| 2017 | 24910.49 | 18412.69 | 25860.32 | 30942.66 | 24530.69 | 23411.73 | 24725.98 | 23529.45 |
| 2018 | 24974.82 | 18412.19 | 25860.86 | 30946.78 | 24621.85 | 23500.13 | 24841.57 | 23584.04 |
| 2019 | 25113.49 | 18411.13 | 25861.25 | 30943.97 | 24819.03 | 23656.8  | 25069.2  | 23702.19 |

**Table S25. The differences of age standardized incidence rates of migraine between East Asia, Southeast Asia, and other regions from 1990 to 2019**

| Year | Global   | East Asia | Southeast Asia | High SDI | High-middle SDI | Middle SDI | Low-middle SDI | Low SDI  |
|------|----------|-----------|----------------|----------|-----------------|------------|----------------|----------|
| 1990 | 1119.528 | 901.7795  | 1296.693       | 1199.733 | 1078.789        | 1106.914   | 1172.49        | 1051.726 |
| 1991 | 1119.506 | 901.528   | 1296.348       | 1199.553 | 1078.073        | 1107.947   | 1172.404       | 1051.275 |
| 1992 | 1119.297 | 901.3001  | 1295.962       | 1199.254 | 1077.206        | 1108.559   | 1172.204       | 1051.307 |
| 1993 | 1118.939 | 901.0777  | 1295.556       | 1198.765 | 1076.215        | 1108.914   | 1171.909       | 1051.293 |
| 1994 | 1118.508 | 900.8841  | 1295.131       | 1198.076 | 1075.255        | 1109.212   | 1171.581       | 1050.826 |
| 1995 | 1118.003 | 900.715   | 1294.67        | 1197.166 | 1074.329        | 1109.459   | 1171.191       | 1050.246 |
| 1996 | 1117.05  | 899.564   | 1293.68        | 1195.162 | 1073.927        | 1109.011   | 1169.996       | 1049.263 |
| 1997 | 1115.477 | 897.0242  | 1291.922       | 1191.989 | 1074.186        | 1107.617   | 1167.749       | 1047.882 |
| 1998 | 1113.876 | 894.1155  | 1289.951       | 1188.583 | 1074.983        | 1106.163   | 1165.243       | 1046.486 |
| 1999 | 1112.843 | 891.8283  | 1288.276       | 1185.96  | 1076.2          | 1105.544   | 1163.287       | 1045.308 |
| 2000 | 1112.89  | 891.172   | 1287.357       | 1184.908 | 1077.71         | 1106.472   | 1162.638       | 1044.76  |
| 2001 | 1114.7   | 895.4634  | 1286.964       | 1184.626 | 1081.023        | 1110.263   | 1163.274       | 1044.744 |
| 2002 | 1117.955 | 905.0799  | 1286.562       | 1183.966 | 1086.779        | 1116.68    | 1164.41        | 1044.838 |
| 2003 | 1121.785 | 916.6676  | 1286.173       | 1183.356 | 1093.528        | 1124.12    | 1165.713       | 1044.935 |
| 2004 | 1125.291 | 926.9365  | 1285.809       | 1183.046 | 1099.788        | 1130.966   | 1166.851       | 1045.014 |
| 2005 | 1127.558 | 932.5783  | 1285.458       | 1183.37  | 1103.968        | 1135.561   | 1167.495       | 1044.986 |
| 2006 | 1129.01  | 934.8989  | 1285.217       | 1184.635 | 1106.44         | 1138.5     | 1167.766       | 1044.977 |
| 2007 | 1130.54  | 937.1688  | 1285.158       | 1186.705 | 1108.669        | 1141.367   | 1168.02        | 1045.204 |
| 2008 | 1131.917 | 939.0771  | 1285.25        | 1188.981 | 1110.563        | 1143.853   | 1168.25        | 1045.56  |
| 2009 | 1133.034 | 940.3418  | 1285.361       | 1191.442 | 1112.019        | 1145.829   | 1168.434       | 1045.953 |
| 2010 | 1133.797 | 940.6666  | 1285.279       | 1193.825 | 1112.876        | 1147.321   | 1168.564       | 1046.286 |
| 2011 | 1134.061 | 940.4268  | 1285.069       | 1197.258 | 1113.367        | 1148.139   | 1167.882       | 1046.136 |

|      |          |          |          |          |          |          |          |          |
|------|----------|----------|----------|----------|----------|----------|----------|----------|
| 2012 | 1133.939 | 940.1529 | 1284.882 | 1202.871 | 1113.725 | 1148.376 | 1166.14  | 1045.485 |
| 2013 | 1133.65  | 939.852  | 1284.708 | 1209.119 | 1113.933 | 1148.33  | 1164.075 | 1044.742 |
| 2014 | 1133.399 | 939.5295 | 1284.55  | 1214.396 | 1114     | 1148.355 | 1162.404 | 1044.17  |
| 2015 | 1133.36  | 939.2278 | 1284.416 | 1217.042 | 1113.882 | 1148.804 | 1161.845 | 1044.043 |
| 2016 | 1133.149 | 938.9902 | 1284.297 | 1216.541 | 1112.127 | 1149.499 | 1162.146 | 1044.166 |
| 2017 | 1132.853 | 938.763  | 1284.188 | 1216.21  | 1110.255 | 1150     | 1162.475 | 1044.123 |
| 2018 | 1135.868 | 946.1969 | 1284.083 | 1217.535 | 1113.414 | 1154.048 | 1167.172 | 1045.612 |
| 2019 | 1142.539 | 962.8369 | 1283.976 | 1219.594 | 1121.242 | 1162.404 | 1177.034 | 1048.938 |

**Table S26. The differences of age standardized incidence rates of tension-type headache between East Asia, Southeast Asia, and other regions from 1990 to 2019**

| Year | Global   | East Asia | Southeast Asia | High SDI | High-middle SDI | Middle SDI | Low-middle SDI | Low SDI  |
|------|----------|-----------|----------------|----------|-----------------|------------|----------------|----------|
| 1990 | 9006.968 | 6589.308  | 9143.992       | 10795.06 | 9038.009        | 8157.181   | 9017.885       | 8669.296 |
| 1991 | 9001.834 | 6590.845  | 9144.22        | 10788.71 | 9026.223        | 8165.962   | 9021.274       | 8668.964 |
| 1992 | 8996.043 | 6591.12   | 9144.416       | 10782.99 | 9013.205        | 8173.445   | 9022.092       | 8668.127 |
| 1993 | 8989.292 | 6590.358  | 9144.567       | 10777.69 | 8998.877        | 8179.836   | 9020.984       | 8666.585 |
| 1994 | 8981.27  | 6588.853  | 9144.697       | 10772.81 | 8982.227        | 8185.242   | 9018.177       | 8663.267 |
| 1995 | 8973.412 | 6586.918  | 9144.81        | 10768.15 | 8965.212        | 8191.302   | 9014.739       | 8659.046 |
| 1996 | 8959.003 | 6571.255  | 9144.876       | 10763.83 | 8938.794        | 8190.041   | 9003.192       | 8650.295 |
| 1997 | 8937.164 | 6538.26   | 9144.899       | 10759.91 | 8902.549        | 8179.453   | 8980.982       | 8636.594 |
| 1998 | 8913.607 | 6503.263  | 9144.892       | 10755.99 | 8864.202        | 8167.312   | 8955.647       | 8622.02  |
| 1999 | 8894.833 | 6481.465  | 9144.907       | 10752.14 | 8832.44         | 8161.762   | 8934.806       | 8609.468 |
| 2000 | 8887.513 | 6488.42   | 9144.983       | 10747.76 | 8816.769        | 8171.025   | 8925.709       | 8602.248 |
| 2001 | 8893.036 | 6538.291  | 9144.973       | 10739.44 | 8822.863        | 8199.259   | 8929.004       | 8594.72  |
| 2002 | 8906.621 | 6619.413  | 9144.964       | 10726.05 | 8846.198        | 8239.6     | 8938.049       | 8582     |
| 2003 | 8922.492 | 6708.595  | 9144.999       | 10710.57 | 8875.276        | 8283.088   | 8949.299       | 8568.174 |
| 2004 | 8935.399 | 6782.605  | 9145.098       | 10695.69 | 8898.35         | 8320.904   | 8959.593       | 8556.803 |
| 2005 | 8940.398 | 6818.554  | 9145.324       | 10684.39 | 8904.614        | 8344.679   | 8965.614       | 8551.073 |
| 2006 | 8938.604 | 6824.387  | 9144.956       | 10676.68 | 8896.715        | 8356.917   | 8967.887       | 8549.845 |
| 2007 | 8935.706 | 6824.952  | 9144.069       | 10670.28 | 8887.486        | 8366.607   | 8969.42        | 8548.996 |
| 2008 | 8932.181 | 6822.611  | 9144.344       | 10663.95 | 8877.545        | 8374.457   | 8970.5         | 8548.089 |
| 2009 | 8928.706 | 6819.452  | 9145.772       | 10658.8  | 8867.653        | 8381.819   | 8971.548       | 8547.266 |
| 2010 | 8925.756 | 6817.909  | 9146.781       | 10655.21 | 8859.024        | 8390.268   | 8972.942       | 8546.412 |
| 2011 | 8923.578 | 6817.89   | 9147.198       | 10651.67 | 8852.748        | 8399.314   | 8974.58        | 8544.828 |

|      |          |          |          |          |          |          |          |          |
|------|----------|----------|----------|----------|----------|----------|----------|----------|
| 2012 | 8921.516 | 6817.817 | 9147.6   | 10649.87 | 8848.472 | 8408.015 | 8976.066 | 8542.876 |
| 2013 | 8919.824 | 6817.77  | 9148.014 | 10649.32 | 8845.494 | 8416.478 | 8977.439 | 8540.977 |
| 2014 | 8918.702 | 6817.622 | 9148.46  | 10649.37 | 8843.485 | 8425.215 | 8978.848 | 8539.295 |
| 2015 | 8917.584 | 6817.554 | 9148.972 | 10649.12 | 8841.33  | 8434.336 | 8980.263 | 8537.762 |
| 2016 | 8916.23  | 6817.529 | 9149.411 | 10648.62 | 8841.69  | 8442.581 | 8980.353 | 8534.855 |
| 2017 | 8916.7   | 6817.47  | 9149.847 | 10648.36 | 8845.462 | 8452.16  | 8984.108 | 8533.299 |
| 2018 | 8933.249 | 6817.386 | 9150.306 | 10649.7  | 8865.679 | 8476.397 | 9014.084 | 8546.565 |
| 2019 | 8968.184 | 6817.18  | 9150.84  | 10652.81 | 8907.259 | 8517.636 | 9072.532 | 8576.006 |

**Table S27. The differences of age standardized YLDs rates of migraine between East Asia, Southeast Asia, and other regions from 1990 to 2019**

| Year | Global   | East Asia | Southeast Asia | High SDI | High-middle SDI | Middle SDI | Low-middle SDI | Low SDI  |
|------|----------|-----------|----------------|----------|-----------------|------------|----------------|----------|
| 1990 | 517.5763 | 406.1116  | 603.3829       | 568.5264 | 516.6344        | 501.1597   | 515.2397       | 472.097  |
| 1991 | 517.5569 | 406.353   | 603.3642       | 569.0123 | 515.8496        | 501.8441   | 515.2433       | 472.0054 |
| 1992 | 517.5594 | 406.5387  | 603.4182       | 569.1928 | 515.2733        | 502.532    | 515.2464       | 472.2006 |
| 1993 | 517.5164 | 406.7193  | 603.3727       | 569.2015 | 514.8317        | 503.1592   | 515.2613       | 472.2783 |
| 1994 | 517.426  | 406.8905  | 603.2436       | 568.8677 | 514.3258        | 503.8288   | 515.3791       | 472.1858 |
| 1995 | 517.2873 | 407.0482  | 603.0668       | 568.2625 | 513.8717        | 504.5112   | 515.4673       | 471.9544 |
| 1996 | 516.7986 | 406.3985  | 602.0002       | 566.8655 | 513.7936        | 504.4385   | 515.1632       | 471.586  |
| 1997 | 515.9404 | 404.8436  | 599.4601       | 564.8996 | 514.3608        | 503.407    | 514.3148       | 471.0755 |
| 1998 | 514.883  | 402.8528  | 596.6252       | 562.711  | 514.9872        | 502.0151   | 513.1907       | 470.462  |
| 1999 | 514.0547 | 401.2851  | 594.3186       | 560.9618 | 515.459         | 501.019    | 512.3964       | 469.9914 |
| 2000 | 513.7088 | 400.7494  | 593.3          | 559.9835 | 515.5718        | 500.9797   | 512.221        | 469.9517 |
| 2001 | 514.2184 | 402.9556  | 593.2808       | 559.563  | 516.0785        | 502.648    | 512.6823       | 469.9766 |
| 2002 | 515.399  | 407.7208  | 593.4633       | 559.1729 | 517.6585        | 505.5565   | 513.39         | 469.9037 |
| 2003 | 516.8576 | 413.5055  | 593.6057       | 558.8333 | 519.7093        | 508.988    | 514.0815       | 469.8474 |
| 2004 | 518.1938 | 418.5449  | 593.6654       | 558.6754 | 521.5654        | 512.0689   | 514.8083       | 469.822  |
| 2005 | 518.9877 | 421.3568  | 593.6723       | 558.7385 | 522.5377        | 514.1192   | 515.2457       | 469.9465 |
| 2006 | 519.5595 | 422.6078  | 593.7487       | 559.4129 | 522.9796        | 515.4806   | 515.6021       | 470.2886 |
| 2007 | 520.3377 | 423.8428  | 594.0476       | 560.5882 | 523.51          | 516.9615   | 516.1956       | 470.7498 |
| 2008 | 521.1185 | 425.0601  | 594.1965       | 561.8444 | 524.2072        | 518.323    | 516.6739       | 471.4214 |
| 2009 | 521.7249 | 425.8768  | 594.4416       | 563.0209 | 524.6207        | 519.478    | 517.1121       | 471.9164 |
| 2010 | 522.0568 | 426.2535  | 594.3338       | 563.7933 | 524.8145        | 520.3562   | 517.3528       | 472.3431 |
| 2011 | 522.1542 | 426.2746  | 594.2858       | 564.951  | 524.9093        | 520.8931   | 517.201        | 472.3393 |

|      |          |          |          |          |          |          |          |          |
|------|----------|----------|----------|----------|----------|----------|----------|----------|
| 2012 | 522.183  | 426.2368 | 594.1792 | 567.2089 | 525.0986 | 521.1895 | 516.5222 | 472.1745 |
| 2013 | 522.1482 | 426.1359 | 594.1344 | 569.704  | 525.3528 | 521.3143 | 515.6787 | 472.0326 |
| 2014 | 522.0835 | 426.042  | 593.9005 | 571.761  | 525.5181 | 521.4587 | 515.0263 | 471.8553 |
| 2015 | 521.9955 | 425.9162 | 593.8192 | 572.5212 | 525.3942 | 521.8305 | 514.8283 | 471.8476 |
| 2016 | 521.6547 | 425.7413 | 593.72   | 570.6109 | 524.8368 | 522.3001 | 515.1055 | 471.9324 |
| 2017 | 521.3093 | 425.6613 | 593.3871 | 568.8676 | 524.1757 | 522.7688 | 515.4324 | 471.976  |
| 2018 | 522.5626 | 428.7897 | 593.244  | 569.1123 | 525.071  | 524.9433 | 517.6686 | 472.8077 |
| 2019 | 525.5431 | 435.9539 | 593.0144 | 570.0201 | 527.5147 | 529.1657 | 522.5602 | 474.7104 |

**Table S28. The differences of age standardized YLDs rates of tension-type headache between East Asia, Southeast Asia, and other regions from 1990 to 2019**

| Year | Global   | East Asia | Southeast Asia | High SDI | High-middle SDI | Middle SDI | Low-middle SDI | Low SDI  |
|------|----------|-----------|----------------|----------|-----------------|------------|----------------|----------|
| 1990 | 57.65456 | 42.97228  | 51.89301       | 67.70824 | 64.69398        | 50.69737   | 51.5078        | 52.74735 |
| 1991 | 57.56881 | 43.00374  | 51.89366       | 67.66532 | 64.46915        | 50.74127   | 51.50726       | 52.75732 |
| 1992 | 57.49054 | 43.00359  | 51.92613       | 67.63828 | 64.26338        | 50.77633   | 51.5042        | 52.79713 |
| 1993 | 57.41278 | 43.0323   | 51.92591       | 67.60504 | 64.07349        | 50.82412   | 51.50116       | 52.80715 |
| 1994 | 57.3287  | 43.06309  | 51.94012       | 67.56956 | 63.86099        | 50.87503   | 51.49477       | 52.7993  |
| 1995 | 57.25115 | 43.06159  | 51.95077       | 67.5426  | 63.63371        | 50.93317   | 51.49814       | 52.81904 |
| 1996 | 57.15611 | 42.93448  | 51.96474       | 67.54067 | 63.45423        | 50.92314   | 51.45899       | 52.78443 |
| 1997 | 57.02114 | 42.6053   | 51.97224       | 67.57064 | 63.30675        | 50.81136   | 51.30631       | 52.72433 |
| 1998 | 56.87905 | 42.23233  | 51.994         | 67.59682 | 63.19199        | 50.67587   | 51.14223       | 52.64872 |
| 1999 | 56.74777 | 41.93544  | 52.01452       | 67.61984 | 63.01811        | 50.58759   | 51.01917       | 52.60126 |
| 2000 | 56.66851 | 41.88685  | 52.01355       | 67.61883 | 62.85781        | 50.61081   | 50.97316       | 52.57067 |
| 2001 | 56.63102 | 42.05531  | 52.04898       | 67.57716 | 62.72341        | 50.74143   | 51.00287       | 52.5051  |
| 2002 | 56.60921 | 42.36006  | 52.05413       | 67.48353 | 62.69236        | 50.91825   | 51.0019        | 52.34639 |
| 2003 | 56.60267 | 42.70303  | 52.09476       | 67.38838 | 62.68945        | 51.13049   | 51.01302       | 52.16175 |
| 2004 | 56.58156 | 42.98113  | 52.11529       | 67.29823 | 62.65502        | 51.3019    | 51.01712       | 52.01145 |
| 2005 | 56.54356 | 43.11121  | 52.13044       | 67.2349  | 62.53849        | 51.41295   | 51.0591        | 51.95328 |
| 2006 | 56.50465 | 43.15712  | 52.12813       | 67.21873 | 62.38187        | 51.50166   | 51.10208       | 51.9865  |
| 2007 | 56.46895 | 43.16527  | 52.13904       | 67.21336 | 62.2453         | 51.56582   | 51.15795       | 52.04199 |
| 2008 | 56.44231 | 43.18706  | 52.15169       | 67.21307 | 62.12453        | 51.64079   | 51.22012       | 52.08559 |
| 2009 | 56.41241 | 43.19681  | 52.16863       | 67.20889 | 62.01752        | 51.70953   | 51.26282       | 52.12725 |
| 2010 | 56.38078 | 43.20225  | 52.19428       | 67.20335 | 61.88654        | 51.78255   | 51.31652       | 52.15261 |
| 2011 | 56.34036 | 43.21189  | 52.21017       | 67.17469 | 61.77451        | 51.84126   | 51.34973       | 52.19031 |

|      |          |          |          |          |          |          |          |          |
|------|----------|----------|----------|----------|----------|----------|----------|----------|
| 2012 | 56.30769 | 43.21156 | 52.22945 | 67.17123 | 61.65796 | 51.90926 | 51.39061 | 52.2363  |
| 2013 | 56.27451 | 43.22698 | 52.23562 | 67.15912 | 61.58252 | 51.95772 | 51.43245 | 52.26842 |
| 2014 | 56.23396 | 43.21979 | 52.23609 | 67.15313 | 61.48148 | 51.99753 | 51.48282 | 52.28718 |
| 2015 | 56.19151 | 43.22092 | 52.24502 | 67.14408 | 61.37716 | 52.04937 | 51.50691 | 52.30937 |
| 2016 | 56.17866 | 43.21713 | 52.25484 | 67.11263 | 61.32092 | 52.12594 | 51.59729 | 52.33888 |
| 2017 | 56.16586 | 43.2194  | 52.25625 | 67.08048 | 61.27183 | 52.21164 | 51.68764 | 52.35978 |
| 2018 | 56.17149 | 43.23608 | 52.25717 | 66.97993 | 61.09989 | 52.35793 | 51.89883 | 52.47577 |
| 2019 | 56.21222 | 43.21889 | 52.25573 | 66.82994 | 60.78646 | 52.59099 | 52.29232 | 52.67052 |

**Table S29. The SDI and age standardized YLDs rates of migraine in East and Southeast Asia from 1990 to 2019.**

| Year | Global |          | East Asia |          | China |          | Democratic People's Republic of Korea |          | Taiwan<br>(Province of China) |          |
|------|--------|----------|-----------|----------|-------|----------|---------------------------------------|----------|-------------------------------|----------|
|      | SDI    | Rate     | SDI       | Rate     | SDI   | Rate     | SDI                                   | Rate     | SDI                           | Rate     |
| 1990 | 0.511  | 517.5763 | 0.447     | 406.1116 | 0.433 | 404.8134 | 0.431                                 | 439.8883 | 0.667                         | 447.9912 |
| 1991 | 0.516  | 517.5569 | 0.456     | 406.353  | 0.441 | 405.0265 | 0.436                                 | 440.1839 | 0.678                         | 449.5315 |
| 1992 | 0.521  | 517.5594 | 0.464     | 406.5387 | 0.45  | 405.1921 | 0.439                                 | 440.0417 | 0.685                         | 450.9605 |
| 1993 | 0.525  | 517.5164 | 0.473     | 406.7193 | 0.459 | 405.3596 | 0.442                                 | 440.0171 | 0.694                         | 452.0447 |
| 1994 | 0.529  | 517.426  | 0.483     | 406.8905 | 0.469 | 405.5267 | 0.445                                 | 439.9717 | 0.702                         | 452.6635 |
| 1995 | 0.534  | 517.2873 | 0.492     | 407.0482 | 0.479 | 405.6899 | 0.447                                 | 439.6334 | 0.711                         | 453.2494 |
| 1996 | 0.538  | 516.7986 | 0.502     | 406.3985 | 0.489 | 405.0244 | 0.45                                  | 439.3398 | 0.719                         | 453.6656 |
| 1997 | 0.542  | 515.9404 | 0.511     | 404.8436 | 0.499 | 403.4256 | 0.451                                 | 439.2712 | 0.731                         | 453.7497 |
| 1998 | 0.547  | 514.883  | 0.52      | 402.8528 | 0.508 | 401.3784 | 0.452                                 | 438.7928 | 0.743                         | 454.0567 |
| 1999 | 0.551  | 514.0547 | 0.528     | 401.2851 | 0.516 | 399.7619 | 0.455                                 | 438.3539 | 0.747                         | 454.6008 |
| 2000 | 0.556  | 513.7088 | 0.537     | 400.7494 | 0.525 | 399.2125 | 0.458                                 | 438.3509 | 0.754                         | 454.6439 |
| 2001 | 0.561  | 514.2184 | 0.545     | 402.9556 | 0.534 | 401.5062 | 0.463                                 | 437.7763 | 0.763                         | 454.8955 |
| 2002 | 0.566  | 515.399  | 0.554     | 407.7208 | 0.543 | 406.4403 | 0.467                                 | 437.0903 | 0.772                         | 455.5586 |
| 2003 | 0.571  | 516.8576 | 0.562     | 413.5055 | 0.552 | 412.4267 | 0.473                                 | 436.557  | 0.779                         | 456.0372 |
| 2004 | 0.576  | 518.1938 | 0.571     | 418.5449 | 0.561 | 417.6281 | 0.478                                 | 436.0907 | 0.787                         | 456.5318 |
| 2005 | 0.581  | 518.9877 | 0.58      | 421.3568 | 0.571 | 420.5307 | 0.485                                 | 435.7019 | 0.795                         | 456.4584 |
| 2006 | 0.586  | 519.5595 | 0.59      | 422.6078 | 0.581 | 421.7789 | 0.49                                  | 434.9566 | 0.802                         | 459.1421 |
| 2007 | 0.591  | 520.3377 | 0.6       | 423.8428 | 0.591 | 422.9713 | 0.496                                 | 434.5421 | 0.81                          | 463.8646 |
| 2008 | 0.596  | 521.1185 | 0.609     | 425.0601 | 0.601 | 424.1221 | 0.502                                 | 434.1264 | 0.817                         | 470.0931 |
| 2009 | 0.601  | 521.7249 | 0.618     | 425.8768 | 0.611 | 424.8685 | 0.507                                 | 433.9438 | 0.824                         | 475.5714 |
| 2010 | 0.607  | 522.0568 | 0.628     | 426.2535 | 0.621 | 425.2205 | 0.513                                 | 433.4056 | 0.83                          | 477.6724 |

|      |       |          |       |          |       |          |       |          |       |          |
|------|-------|----------|-------|----------|-------|----------|-------|----------|-------|----------|
| 2011 | 0.612 | 522.1542 | 0.637 | 426.2746 | 0.631 | 425.2539 | 0.518 | 433.303  | 0.833 | 476.6625 |
| 2012 | 0.616 | 522.183  | 0.644 | 426.2368 | 0.638 | 425.2399 | 0.523 | 432.9159 | 0.838 | 475.3569 |
| 2013 | 0.621 | 522.1482 | 0.652 | 426.1359 | 0.646 | 425.1746 | 0.528 | 432.6531 | 0.843 | 473.0573 |
| 2014 | 0.626 | 522.0835 | 0.66  | 426.042  | 0.654 | 425.106  | 0.534 | 432.3802 | 0.848 | 471.521  |
| 2015 | 0.631 | 521.9955 | 0.662 | 425.9162 | 0.657 | 424.9956 | 0.538 | 431.9891 | 0.852 | 470.8366 |
| 2016 | 0.635 | 521.6547 | 0.665 | 425.7413 | 0.659 | 424.8281 | 0.543 | 431.3226 | 0.856 | 470.7944 |
| 2017 | 0.641 | 521.3093 | 0.675 | 425.6613 | 0.669 | 424.7474 | 0.548 | 431.172  | 0.86  | 470.9429 |
| 2018 | 0.647 | 522.5626 | 0.684 | 428.7897 | 0.679 | 427.9931 | 0.553 | 430.9809 | 0.865 | 471.1755 |
| 2019 | 0.651 | 525.5431 | 0.691 | 435.9539 | 0.686 | 435.422  | 0.558 | 430.4821 | 0.868 | 471.8434 |

**Table S29 (continued).**

| Year | Southeast Asia |          | Cambodia |          | Indonesia |          | Lao People's Democratic Republic |          | Malaysia |          |
|------|----------------|----------|----------|----------|-----------|----------|----------------------------------|----------|----------|----------|
|      | SDI            | Rate     | SDI      | Rate     | SDI       | Rate     | SDI                              | Rate     | SDI      | Rate     |
| 1990 | 0.455          | 603.3829 | 0.266    | 584.7253 | 0.452     | 594.4035 | 0.268                            | 580.3    | 0.542    | 511.9893 |
| 1991 | 0.463          | 603.3642 | 0.272    | 584.6472 | 0.462     | 594.5488 | 0.274                            | 579.6707 | 0.548    | 511.6141 |
| 1992 | 0.471          | 603.4182 | 0.277    | 584.5249 | 0.472     | 594.5922 | 0.279                            | 579.3158 | 0.554    | 511.3835 |
| 1993 | 0.479          | 603.3727 | 0.282    | 584.433  | 0.481     | 594.7643 | 0.285                            | 579.3833 | 0.562    | 511.2392 |
| 1994 | 0.488          | 603.2436 | 0.286    | 584.0514 | 0.49      | 594.7086 | 0.29                             | 579.343  | 0.572    | 510.9946 |
| 1995 | 0.496          | 603.0668 | 0.291    | 583.7219 | 0.499     | 594.6769 | 0.296                            | 578.8206 | 0.581    | 510.7442 |
| 1996 | 0.504          | 602.0002 | 0.296    | 583.6801 | 0.508     | 594.6915 | 0.302                            | 578.6417 | 0.59     | 511.1545 |
| 1997 | 0.512          | 599.4601 | 0.301    | 583.549  | 0.516     | 594.5772 | 0.309                            | 579.2226 | 0.6      | 511.1186 |
| 1998 | 0.517          | 596.6252 | 0.307    | 583.4225 | 0.522     | 594.6428 | 0.315                            | 578.6715 | 0.611    | 511.1237 |
| 1999 | 0.523          | 594.3186 | 0.313    | 582.9655 | 0.527     | 594.7022 | 0.322                            | 578.8252 | 0.622    | 510.7808 |
| 2000 | 0.528          | 593.3    | 0.321    | 582.8874 | 0.533     | 594.603  | 0.329                            | 578.4997 | 0.63     | 510.8488 |

|      |       |          |       |          |       |          |       |          |       |          |
|------|-------|----------|-------|----------|-------|----------|-------|----------|-------|----------|
| 2001 | 0.533 | 593.2808 | 0.328 | 583.2551 | 0.537 | 594.7341 | 0.336 | 578.1332 | 0.638 | 510.8781 |
| 2002 | 0.538 | 593.4633 | 0.337 | 583.2874 | 0.542 | 595.0545 | 0.344 | 578.1546 | 0.646 | 510.9315 |
| 2003 | 0.543 | 593.6057 | 0.345 | 583.1634 | 0.547 | 595.2541 | 0.351 | 578.3652 | 0.652 | 510.9564 |
| 2004 | 0.548 | 593.6654 | 0.354 | 583.4371 | 0.552 | 595.4392 | 0.359 | 578.0415 | 0.659 | 510.8988 |
| 2005 | 0.554 | 593.6723 | 0.363 | 583.42   | 0.558 | 595.4198 | 0.367 | 578.5816 | 0.665 | 510.8491 |
| 2006 | 0.559 | 593.7487 | 0.373 | 583.5489 | 0.564 | 595.4066 | 0.376 | 578.4345 | 0.671 | 512.3925 |
| 2007 | 0.566 | 594.0476 | 0.382 | 583.4341 | 0.571 | 595.5781 | 0.385 | 578.5678 | 0.677 | 516.286  |
| 2008 | 0.572 | 594.1965 | 0.391 | 582.8537 | 0.578 | 595.5872 | 0.394 | 578.3225 | 0.681 | 519.9961 |
| 2009 | 0.578 | 594.4416 | 0.399 | 583.2456 | 0.585 | 595.6098 | 0.403 | 578.3761 | 0.687 | 523.8293 |
| 2010 | 0.585 | 594.3338 | 0.406 | 583.3609 | 0.593 | 595.6268 | 0.413 | 578.4716 | 0.693 | 524.9304 |
| 2011 | 0.592 | 594.2858 | 0.413 | 582.6966 | 0.601 | 595.5781 | 0.422 | 578.4651 | 0.698 | 524.9116 |
| 2012 | 0.599 | 594.1792 | 0.421 | 582.6998 | 0.609 | 595.5479 | 0.431 | 578.6986 | 0.704 | 524.8563 |
| 2013 | 0.606 | 594.1344 | 0.428 | 582.8031 | 0.617 | 595.4099 | 0.441 | 578.4906 | 0.71  | 524.3997 |
| 2014 | 0.612 | 593.9005 | 0.435 | 582.5998 | 0.625 | 595.3477 | 0.45  | 578.3767 | 0.716 | 524.3127 |
| 2015 | 0.619 | 593.8192 | 0.442 | 582.4013 | 0.633 | 595.3356 | 0.458 | 578.6083 | 0.722 | 524.1072 |
| 2016 | 0.626 | 593.72   | 0.449 | 582.1279 | 0.64  | 595.2261 | 0.467 | 578.4311 | 0.726 | 524.273  |
| 2017 | 0.632 | 593.3871 | 0.456 | 581.7773 | 0.647 | 594.9966 | 0.475 | 578.3285 | 0.728 | 524.2853 |
| 2018 | 0.639 | 593.244  | 0.463 | 581.5828 | 0.654 | 594.8404 | 0.483 | 577.9873 | 0.732 | 524.0665 |
| 2019 | 0.644 | 593.0144 | 0.469 | 581.1506 | 0.66  | 594.6329 | 0.49  | 577.8128 | 0.737 | 524.1404 |

**Table S29 (continued).**

| Year | Maldives |          | Mauritius |          | Myanmar |          | Philippines |          | Seychelles |          |
|------|----------|----------|-----------|----------|---------|----------|-------------|----------|------------|----------|
|      | SDI      | Rate     | SDI       | Rate     | SDI     | Rate     | SDI         | Rate     | SDI        | Rate     |
| 1990 | 0.303    | 571.2276 | 0.527     | 577.3293 | 0.284   | 577.6998 | 0.497       | 591.6194 | 0.567      | 579.7499 |
| 1991 | 0.314    | 571.9662 | 0.532     | 577.3659 | 0.287   | 577.5196 | 0.501       | 591.4492 | 0.576      | 579.5682 |

|      |       |          |       |          |       |          |       |          |       |          |
|------|-------|----------|-------|----------|-------|----------|-------|----------|-------|----------|
| 1992 | 0.324 | 572.8114 | 0.535 | 577.0134 | 0.29  | 577.8719 | 0.505 | 591.4119 | 0.584 | 579.785  |
| 1993 | 0.336 | 573.3282 | 0.543 | 577.3713 | 0.295 | 577.8057 | 0.509 | 591.3793 | 0.592 | 579.7247 |
| 1994 | 0.347 | 573.8912 | 0.556 | 577.4065 | 0.3   | 577.7819 | 0.513 | 591.3166 | 0.6   | 579.8467 |
| 1995 | 0.359 | 574.618  | 0.565 | 577.6465 | 0.306 | 578.3172 | 0.518 | 591.3289 | 0.607 | 579.7027 |
| 1996 | 0.37  | 574.8022 | 0.57  | 577.2468 | 0.313 | 578.2892 | 0.522 | 591.319  | 0.614 | 580.1731 |
| 1997 | 0.382 | 574.6876 | 0.576 | 576.9666 | 0.32  | 578.4971 | 0.526 | 591.3104 | 0.621 | 580.1243 |
| 1998 | 0.394 | 574.2836 | 0.583 | 577.2492 | 0.327 | 578.6726 | 0.529 | 591.3385 | 0.629 | 580.0188 |
| 1999 | 0.406 | 574.4266 | 0.588 | 576.7863 | 0.335 | 578.9681 | 0.532 | 591.4616 | 0.636 | 580.133  |
| 2000 | 0.417 | 574.5317 | 0.593 | 576.9816 | 0.344 | 579.2614 | 0.534 | 591.5113 | 0.642 | 579.5873 |
| 2001 | 0.427 | 575.529  | 0.598 | 576.9308 | 0.353 | 579.0725 | 0.537 | 591.7279 | 0.647 | 579.3218 |
| 2002 | 0.437 | 576.7792 | 0.603 | 576.6448 | 0.363 | 579.9227 | 0.54  | 592.0412 | 0.652 | 578.4494 |
| 2003 | 0.447 | 578.1855 | 0.608 | 576.7007 | 0.373 | 580.2859 | 0.542 | 592.4174 | 0.656 | 577.9478 |
| 2004 | 0.456 | 578.4668 | 0.614 | 576.4293 | 0.384 | 580.8325 | 0.545 | 592.7918 | 0.659 | 577.1713 |
| 2005 | 0.464 | 578.8559 | 0.621 | 576.3165 | 0.395 | 581.0855 | 0.547 | 592.9285 | 0.662 | 576.9088 |
| 2006 | 0.473 | 578.3641 | 0.627 | 576.0936 | 0.406 | 581.4472 | 0.55  | 593.0284 | 0.666 | 576.3361 |
| 2007 | 0.481 | 577.1535 | 0.633 | 576.1074 | 0.417 | 582.1122 | 0.554 | 593.1802 | 0.67  | 575.5279 |
| 2008 | 0.49  | 576.33   | 0.64  | 576.1376 | 0.427 | 582.0003 | 0.558 | 593.3811 | 0.673 | 574.8897 |
| 2009 | 0.497 | 574.1498 | 0.646 | 576.3076 | 0.437 | 582.8436 | 0.562 | 593.4676 | 0.676 | 574.7438 |
| 2010 | 0.504 | 572.0296 | 0.652 | 576.0973 | 0.446 | 582.9731 | 0.567 | 593.469  | 0.679 | 573.7531 |
| 2011 | 0.511 | 570.0575 | 0.658 | 576.2322 | 0.455 | 583.1552 | 0.572 | 593.6067 | 0.683 | 573.4728 |
| 2012 | 0.518 | 567.3428 | 0.665 | 576.0671 | 0.464 | 583.3047 | 0.577 | 593.5914 | 0.687 | 572.4332 |
| 2013 | 0.525 | 564.7517 | 0.673 | 576.116  | 0.473 | 584.1061 | 0.583 | 593.5679 | 0.691 | 571.9267 |
| 2014 | 0.532 | 562.535  | 0.68  | 576.1645 | 0.482 | 583.4356 | 0.589 | 593.53   | 0.696 | 571.1227 |
| 2015 | 0.538 | 559.9879 | 0.686 | 576.2259 | 0.49  | 583.945  | 0.596 | 593.5126 | 0.702 | 570.8811 |
| 2016 | 0.544 | 557.7054 | 0.69  | 575.9186 | 0.498 | 584.3282 | 0.603 | 593.4145 | 0.707 | 570.6505 |

|      |       |          |       |          |       |          |       |          |       |          |
|------|-------|----------|-------|----------|-------|----------|-------|----------|-------|----------|
| 2017 | 0.551 | 556.1179 | 0.695 | 576.2469 | 0.506 | 583.94   | 0.61  | 593.216  | 0.713 | 570.0368 |
| 2018 | 0.557 | 554.4606 | 0.7   | 576.0483 | 0.514 | 584.1528 | 0.617 | 593.1088 | 0.719 | 569.9869 |
| 2019 | 0.562 | 552.8724 | 0.705 | 576.2868 | 0.521 | 584.3487 | 0.623 | 593.0212 | 0.724 | 569.3117 |

| <b>Table S29 (continued).</b> |           |          |          |          |             |          |          |          |  |
|-------------------------------|-----------|----------|----------|----------|-------------|----------|----------|----------|--|
| Year                          | Sri Lanka |          | Thailand |          | Timor-Leste |          | Viet Nam |          |  |
|                               | SDI       | Rate     | SDI      | Rate     | SDI         | Rate     | SDI      | Rate     |  |
| 1990                          | 0.504     | 576.8213 | 0.508    | 713.425  | 0.274       | 569.5507 | 0.39     | 587.6754 |  |
| 1991                          | 0.511     | 576.9542 | 0.518    | 713.5959 | 0.28        | 569.8738 | 0.397    | 587.5695 |  |
| 1992                          | 0.518     | 577.7433 | 0.527    | 713.976  | 0.286       | 569.3975 | 0.404    | 587.5764 |  |
| 1993                          | 0.525     | 577.9018 | 0.536    | 714.1607 | 0.293       | 569.283  | 0.412    | 587.2916 |  |
| 1994                          | 0.532     | 578.276  | 0.544    | 714.5338 | 0.3         | 569.5716 | 0.42     | 587.1248 |  |
| 1995                          | 0.539     | 578.3351 | 0.553    | 714.48   | 0.308       | 569.7484 | 0.429    | 586.7481 |  |
| 1996                          | 0.547     | 578.5157 | 0.562    | 707.1492 | 0.317       | 568.5028 | 0.438    | 586.9265 |  |
| 1997                          | 0.554     | 578.8439 | 0.569    | 689.5073 | 0.326       | 566.671  | 0.447    | 586.4388 |  |
| 1998                          | 0.561     | 579.2515 | 0.574    | 668.4817 | 0.334       | 564.4492 | 0.455    | 586.297  |  |
| 1999                          | 0.567     | 579.3349 | 0.578    | 650.7556 | 0.339       | 562.4149 | 0.463    | 586.6415 |  |
| 2000                          | 0.573     | 579.6242 | 0.583    | 643.5506 | 0.345       | 561.5572 | 0.471    | 586.5876 |  |
| 2001                          | 0.578     | 580.4808 | 0.589    | 643.7149 | 0.352       | 562.5342 | 0.478    | 586.1276 |  |
| 2002                          | 0.582     | 580.6819 | 0.594    | 643.5864 | 0.358       | 565.5642 | 0.486    | 586.1117 |  |
| 2003                          | 0.587     | 580.722  | 0.599    | 644.1875 | 0.364       | 568.8137 | 0.493    | 585.9177 |  |
| 2004                          | 0.592     | 581.4182 | 0.605    | 643.7925 | 0.374       | 571.3696 | 0.501    | 585.7395 |  |
| 2005                          | 0.597     | 581.6156 | 0.61     | 644.0313 | 0.388       | 572.6879 | 0.509    | 585.7865 |  |
| 2006                          | 0.602     | 581.5818 | 0.616    | 644.0342 | 0.406       | 572.5247 | 0.517    | 585.504  |  |
| 2007                          | 0.609     | 581.961  | 0.623    | 643.4645 | 0.421       | 572.7719 | 0.525    | 585.2083 |  |

|      |       |          |       |          |       |          |       |          |
|------|-------|----------|-------|----------|-------|----------|-------|----------|
| 2008 | 0.615 | 582.0225 | 0.629 | 643.6315 | 0.436 | 572.9931 | 0.533 | 585.1783 |
| 2009 | 0.621 | 582.4664 | 0.633 | 644.7809 | 0.448 | 573.4703 | 0.541 | 585.2178 |
| 2010 | 0.628 | 582.5503 | 0.638 | 644.8898 | 0.458 | 573.5333 | 0.549 | 584.8829 |
| 2011 | 0.636 | 582.5629 | 0.643 | 645.115  | 0.469 | 573.6827 | 0.558 | 584.8456 |
| 2012 | 0.644 | 582.7728 | 0.649 | 645.1989 | 0.48  | 573.8748 | 0.566 | 584.5454 |
| 2013 | 0.651 | 582.8338 | 0.655 | 645.4715 | 0.488 | 575.1237 | 0.573 | 584.6159 |
| 2014 | 0.658 | 582.8558 | 0.66  | 645.2249 | 0.493 | 575.6244 | 0.581 | 584.3359 |
| 2015 | 0.666 | 582.5982 | 0.666 | 645.1706 | 0.498 | 575.5808 | 0.589 | 584.2874 |
| 2016 | 0.672 | 582.8369 | 0.671 | 645.3512 | 0.503 | 575.653  | 0.596 | 584.1531 |
| 2017 | 0.678 | 582.6693 | 0.676 | 644.9582 | 0.508 | 575.6509 | 0.604 | 583.6727 |
| 2018 | 0.684 | 582.9538 | 0.682 | 644.8597 | 0.511 | 575.6111 | 0.611 | 583.7363 |
| 2019 | 0.69  | 582.3943 | 0.687 | 645.0165 | 0.514 | 576.5423 | 0.617 | 583.2156 |

**Table S30. The SDI and age standardized YLDs rates of tension-type headache in East and Southeast Asia from 1990 to 2019.**

| Year | Global |          | East Asia |          | China |          | Democratic People's Republic of Korea |          | Taiwan<br>(Province of China) |          |
|------|--------|----------|-----------|----------|-------|----------|---------------------------------------|----------|-------------------------------|----------|
|      | SDI    | Rate     | SDI       | Rate     | SDI   | Rate     | SDI                                   | Rate     | SDI                           | Rate     |
| 1990 | 0.511  | 57.65456 | 0.447     | 42.97228 | 0.433 | 43.02804 | 0.431                                 | 41.81182 | 0.667                         | 41.22168 |
| 1991 | 0.516  | 57.56881 | 0.456     | 43.00374 | 0.441 | 43.06035 | 0.436                                 | 41.81007 | 0.678                         | 41.24316 |
| 1992 | 0.521  | 57.49054 | 0.464     | 43.00359 | 0.45  | 43.06196 | 0.439                                 | 41.817   | 0.685                         | 41.14489 |
| 1993 | 0.525  | 57.41278 | 0.473     | 43.0323  | 0.459 | 43.08856 | 0.442                                 | 41.89105 | 0.694                         | 41.22919 |
| 1994 | 0.529  | 57.3287  | 0.483     | 43.06309 | 0.469 | 43.12114 | 0.445                                 | 41.80699 | 0.702                         | 41.26151 |
| 1995 | 0.534  | 57.25115 | 0.492     | 43.06159 | 0.479 | 43.11982 | 0.447                                 | 41.80005 | 0.711                         | 41.23013 |
| 1996 | 0.538  | 57.15611 | 0.502     | 42.93448 | 0.489 | 42.98665 | 0.45                                  | 41.82908 | 0.719                         | 41.27699 |
| 1997 | 0.542  | 57.02114 | 0.511     | 42.6053  | 0.499 | 42.64519 | 0.451                                 | 41.84198 | 0.731                         | 41.29142 |
| 1998 | 0.547  | 56.87905 | 0.52      | 42.23233 | 0.508 | 42.25862 | 0.452                                 | 41.82073 | 0.743                         | 41.30267 |
| 1999 | 0.551  | 56.74777 | 0.528     | 41.93544 | 0.516 | 41.95007 | 0.455                                 | 41.83305 | 0.747                         | 41.35734 |
| 2000 | 0.556  | 56.66851 | 0.537     | 41.88685 | 0.525 | 41.90174 | 0.458                                 | 41.74895 | 0.754                         | 41.32043 |
| 2001 | 0.561  | 56.63102 | 0.545     | 42.05531 | 0.534 | 42.07311 | 0.463                                 | 41.78401 | 0.763                         | 41.43669 |
| 2002 | 0.566  | 56.60921 | 0.554     | 42.36006 | 0.543 | 42.38697 | 0.467                                 | 41.77002 | 0.772                         | 41.4886  |
| 2003 | 0.571  | 56.60267 | 0.562     | 42.70303 | 0.552 | 42.7399  | 0.473                                 | 41.7385  | 0.779                         | 41.57343 |
| 2004 | 0.576  | 56.58156 | 0.571     | 42.98113 | 0.561 | 43.02296 | 0.478                                 | 41.78162 | 0.787                         | 41.76571 |
| 2005 | 0.581  | 56.54356 | 0.58      | 43.11121 | 0.571 | 43.15579 | 0.485                                 | 41.76633 | 0.795                         | 41.87078 |
| 2006 | 0.586  | 56.50465 | 0.59      | 43.15712 | 0.581 | 43.20237 | 0.49                                  | 41.77882 | 0.802                         | 41.928   |
| 2007 | 0.591  | 56.46895 | 0.6       | 43.16527 | 0.591 | 43.21017 | 0.496                                 | 41.72862 | 0.81                          | 42.02567 |
| 2008 | 0.596  | 56.44231 | 0.609     | 43.18706 | 0.601 | 43.23276 | 0.502                                 | 41.73426 | 0.817                         | 42.02879 |
| 2009 | 0.601  | 56.41241 | 0.618     | 43.19681 | 0.611 | 43.24292 | 0.507                                 | 41.68404 | 0.824                         | 42.09159 |
| 2010 | 0.607  | 56.38078 | 0.628     | 43.20225 | 0.621 | 43.24915 | 0.513                                 | 41.66139 | 0.83                          | 42.09773 |

|      |       |          |       |          |       |          |       |          |       |          |
|------|-------|----------|-------|----------|-------|----------|-------|----------|-------|----------|
| 2011 | 0.612 | 56.34036 | 0.637 | 43.21189 | 0.631 | 43.25841 | 0.518 | 41.65795 | 0.833 | 42.12631 |
| 2012 | 0.616 | 56.30769 | 0.644 | 43.21156 | 0.638 | 43.25627 | 0.523 | 41.70441 | 0.838 | 42.18824 |
| 2013 | 0.621 | 56.27451 | 0.652 | 43.22698 | 0.646 | 43.27229 | 0.528 | 41.71921 | 0.843 | 42.16077 |
| 2014 | 0.626 | 56.23396 | 0.66  | 43.21979 | 0.654 | 43.26457 | 0.534 | 41.70135 | 0.848 | 42.17324 |
| 2015 | 0.631 | 56.19151 | 0.662 | 43.22092 | 0.657 | 43.26601 | 0.538 | 41.68893 | 0.852 | 42.17573 |
| 2016 | 0.635 | 56.17866 | 0.665 | 43.21713 | 0.659 | 43.26109 | 0.543 | 41.68257 | 0.856 | 42.22733 |
| 2017 | 0.641 | 56.16586 | 0.675 | 43.2194  | 0.669 | 43.26256 | 0.548 | 41.68567 | 0.86  | 42.27596 |
| 2018 | 0.647 | 56.17149 | 0.684 | 43.23608 | 0.679 | 43.28086 | 0.553 | 41.67947 | 0.865 | 42.20038 |
| 2019 | 0.651 | 56.21222 | 0.691 | 43.21889 | 0.686 | 43.26289 | 0.558 | 41.67635 | 0.868 | 42.22665 |

**Table S30 (continued).**

| Year | Southeast Asia |          | Cambodia |          | Indonesia |          | Lao People's Democratic Republic |          | Malaysia |          |
|------|----------------|----------|----------|----------|-----------|----------|----------------------------------|----------|----------|----------|
|      | SDI            | Rate     | SDI      | Rate     | SDI       | Rate     | SDI                              | Rate     | SDI      | Rate     |
| 1990 | 0.455          | 51.89301 | 0.266    | 50.05179 | 0.452     | 53.38903 | 0.268                            | 49.9529  | 0.542    | 50.02682 |
| 1991 | 0.463          | 51.89366 | 0.272    | 50.05731 | 0.462     | 53.40291 | 0.274                            | 49.94831 | 0.548    | 50.02746 |
| 1992 | 0.471          | 51.92613 | 0.277    | 50.03382 | 0.472     | 53.45012 | 0.279                            | 49.97807 | 0.554    | 50.0743  |
| 1993 | 0.479          | 51.92591 | 0.282    | 50.07518 | 0.481     | 53.44441 | 0.285                            | 49.89746 | 0.562    | 50.03314 |
| 1994 | 0.488          | 51.94012 | 0.286    | 50.0756  | 0.49      | 53.46963 | 0.29                             | 49.96206 | 0.572    | 50.07811 |
| 1995 | 0.496          | 51.95077 | 0.291    | 50.08503 | 0.499     | 53.48598 | 0.296                            | 49.99078 | 0.581    | 50.10643 |
| 1996 | 0.504          | 51.96474 | 0.296    | 50.11423 | 0.508     | 53.49398 | 0.302                            | 50.02832 | 0.59     | 50.10885 |
| 1997 | 0.512          | 51.97224 | 0.301    | 50.05918 | 0.516     | 53.51468 | 0.309                            | 50.03432 | 0.6      | 50.14778 |
| 1998 | 0.517          | 51.994   | 0.307    | 50.12077 | 0.522     | 53.51946 | 0.315                            | 50.00608 | 0.611    | 50.0897  |
| 1999 | 0.523          | 52.01452 | 0.313    | 50.16791 | 0.527     | 53.52851 | 0.322                            | 50.05702 | 0.622    | 50.15112 |
| 2000 | 0.528          | 52.01355 | 0.321    | 50.1876  | 0.533     | 53.52838 | 0.329                            | 50.05719 | 0.63     | 50.12169 |

|      |       |          |       |          |       |          |       |          |       |          |
|------|-------|----------|-------|----------|-------|----------|-------|----------|-------|----------|
| 2001 | 0.533 | 52.04898 | 0.328 | 50.17824 | 0.537 | 53.54893 | 0.336 | 50.03691 | 0.638 | 50.19495 |
| 2002 | 0.538 | 52.05413 | 0.337 | 50.14849 | 0.542 | 53.57431 | 0.344 | 50.06201 | 0.646 | 50.13883 |
| 2003 | 0.543 | 52.09476 | 0.345 | 50.1594  | 0.547 | 53.5997  | 0.351 | 50.04678 | 0.652 | 50.13885 |
| 2004 | 0.548 | 52.11529 | 0.354 | 50.1558  | 0.552 | 53.6279  | 0.359 | 50.05127 | 0.659 | 50.19756 |
| 2005 | 0.554 | 52.13044 | 0.363 | 50.18015 | 0.558 | 53.63791 | 0.367 | 50.04713 | 0.665 | 50.15486 |
| 2006 | 0.559 | 52.12813 | 0.373 | 50.24308 | 0.564 | 53.64693 | 0.376 | 50.07716 | 0.671 | 50.16389 |
| 2007 | 0.566 | 52.13904 | 0.382 | 50.26938 | 0.571 | 53.6486  | 0.385 | 50.08699 | 0.677 | 50.25973 |
| 2008 | 0.572 | 52.15169 | 0.391 | 50.29035 | 0.578 | 53.66644 | 0.394 | 50.098   | 0.681 | 50.3106  |
| 2009 | 0.578 | 52.16863 | 0.399 | 50.32159 | 0.585 | 53.68382 | 0.403 | 50.13333 | 0.687 | 50.35963 |
| 2010 | 0.585 | 52.19428 | 0.406 | 50.29224 | 0.593 | 53.70394 | 0.413 | 50.18145 | 0.693 | 50.39325 |
| 2011 | 0.592 | 52.21017 | 0.413 | 50.30172 | 0.601 | 53.72039 | 0.422 | 50.17494 | 0.698 | 50.40513 |
| 2012 | 0.599 | 52.22945 | 0.421 | 50.31019 | 0.609 | 53.73568 | 0.431 | 50.16703 | 0.704 | 50.4212  |
| 2013 | 0.606 | 52.23562 | 0.428 | 50.35545 | 0.617 | 53.72048 | 0.441 | 50.19903 | 0.71  | 50.33594 |
| 2014 | 0.612 | 52.23609 | 0.435 | 50.31523 | 0.625 | 53.73422 | 0.45  | 50.22152 | 0.716 | 50.32041 |
| 2015 | 0.619 | 52.24502 | 0.442 | 50.32063 | 0.633 | 53.74346 | 0.458 | 50.21531 | 0.722 | 50.33658 |
| 2016 | 0.626 | 52.25484 | 0.449 | 50.34536 | 0.64  | 53.75858 | 0.467 | 50.22971 | 0.726 | 50.33679 |
| 2017 | 0.632 | 52.25625 | 0.456 | 50.36497 | 0.647 | 53.75737 | 0.475 | 50.27508 | 0.728 | 50.37442 |
| 2018 | 0.639 | 52.25717 | 0.463 | 50.32629 | 0.654 | 53.76456 | 0.483 | 50.28141 | 0.732 | 50.32672 |
| 2019 | 0.644 | 52.25573 | 0.469 | 50.31211 | 0.66  | 53.73914 | 0.49  | 50.20991 | 0.737 | 50.35815 |

**Table S30 (continued).**

| Year | Maldives |          | Mauritius |          | Myanmar |          | Philippines |          | Seychelles |          |
|------|----------|----------|-----------|----------|---------|----------|-------------|----------|------------|----------|
|      | SDI      | Rate     | SDI       | Rate     | SDI     | Rate     | SDI         | Rate     | SDI        | Rate     |
| 1990 | 0.303    | 49.71489 | 0.527     | 50.22963 | 0.284   | 49.91413 | 0.497       | 53.35676 | 0.567      | 50.48703 |
| 1991 | 0.314    | 49.79513 | 0.532     | 50.20182 | 0.287   | 49.89373 | 0.501       | 53.36586 | 0.576      | 50.49087 |

|      |       |          |       |          |       |          |       |          |       |          |
|------|-------|----------|-------|----------|-------|----------|-------|----------|-------|----------|
| 1992 | 0.324 | 49.7883  | 0.535 | 50.19061 | 0.29  | 49.89281 | 0.505 | 53.35952 | 0.584 | 50.49109 |
| 1993 | 0.336 | 49.8461  | 0.543 | 50.22931 | 0.295 | 49.88019 | 0.509 | 53.36089 | 0.592 | 50.52609 |
| 1994 | 0.347 | 49.91827 | 0.556 | 50.1916  | 0.3   | 49.91926 | 0.513 | 53.36729 | 0.6   | 50.48574 |
| 1995 | 0.359 | 49.92964 | 0.565 | 50.15599 | 0.306 | 49.94635 | 0.518 | 53.37408 | 0.607 | 50.52734 |
| 1996 | 0.37  | 49.99234 | 0.57  | 50.18988 | 0.313 | 49.94364 | 0.522 | 53.38062 | 0.614 | 50.54527 |
| 1997 | 0.382 | 49.93756 | 0.576 | 50.2287  | 0.32  | 49.97066 | 0.526 | 53.37745 | 0.621 | 50.51523 |
| 1998 | 0.394 | 49.95556 | 0.583 | 50.21091 | 0.327 | 49.96677 | 0.529 | 53.39737 | 0.629 | 50.52814 |
| 1999 | 0.406 | 49.98555 | 0.588 | 50.19655 | 0.335 | 50.01731 | 0.532 | 53.40359 | 0.636 | 50.53158 |
| 2000 | 0.417 | 49.96772 | 0.593 | 50.18541 | 0.344 | 49.9911  | 0.534 | 53.42226 | 0.642 | 50.48271 |
| 2001 | 0.427 | 50.05912 | 0.598 | 50.1989  | 0.353 | 50.04988 | 0.537 | 53.4387  | 0.647 | 50.50413 |
| 2002 | 0.437 | 50.12501 | 0.603 | 50.21645 | 0.363 | 50.0324  | 0.54  | 53.45872 | 0.652 | 50.47689 |
| 2003 | 0.447 | 50.2336  | 0.608 | 50.25034 | 0.373 | 50.12035 | 0.542 | 53.46873 | 0.656 | 50.47866 |
| 2004 | 0.456 | 50.27013 | 0.614 | 50.20409 | 0.384 | 50.15375 | 0.545 | 53.49794 | 0.659 | 50.47934 |
| 2005 | 0.464 | 50.32758 | 0.621 | 50.18973 | 0.395 | 50.15165 | 0.547 | 53.51996 | 0.662 | 50.52273 |
| 2006 | 0.473 | 50.28671 | 0.627 | 50.14622 | 0.406 | 50.22193 | 0.55  | 53.53331 | 0.666 | 50.45785 |
| 2007 | 0.481 | 50.28128 | 0.633 | 50.17048 | 0.417 | 50.29453 | 0.554 | 53.54632 | 0.67  | 50.46475 |
| 2008 | 0.49  | 50.3371  | 0.64  | 50.18492 | 0.427 | 50.36308 | 0.558 | 53.55162 | 0.673 | 50.45718 |
| 2009 | 0.497 | 50.22615 | 0.646 | 50.14122 | 0.437 | 50.25729 | 0.562 | 53.56064 | 0.676 | 50.40471 |
| 2010 | 0.504 | 50.20925 | 0.652 | 50.21553 | 0.446 | 50.35476 | 0.567 | 53.57026 | 0.679 | 50.42532 |
| 2011 | 0.511 | 50.15255 | 0.658 | 50.1837  | 0.455 | 50.3657  | 0.572 | 53.58085 | 0.683 | 50.36238 |
| 2012 | 0.518 | 50.06932 | 0.665 | 50.16226 | 0.464 | 50.41571 | 0.577 | 53.59878 | 0.687 | 50.33233 |
| 2013 | 0.525 | 49.9963  | 0.673 | 50.20504 | 0.473 | 50.4516  | 0.583 | 53.60568 | 0.691 | 50.33572 |
| 2014 | 0.532 | 49.97071 | 0.68  | 50.21174 | 0.482 | 50.46002 | 0.589 | 53.61757 | 0.696 | 50.32936 |
| 2015 | 0.538 | 49.89813 | 0.686 | 50.26716 | 0.49  | 50.47716 | 0.596 | 53.63072 | 0.702 | 50.30462 |
| 2016 | 0.544 | 49.9003  | 0.69  | 50.20984 | 0.498 | 50.40022 | 0.603 | 53.63824 | 0.707 | 50.36924 |

|      |       |          |       |          |       |          |       |          |       |          |
|------|-------|----------|-------|----------|-------|----------|-------|----------|-------|----------|
| 2017 | 0.551 | 49.88773 | 0.695 | 50.29965 | 0.506 | 50.52711 | 0.61  | 53.64435 | 0.713 | 50.26876 |
| 2018 | 0.557 | 49.83259 | 0.7   | 50.23017 | 0.514 | 50.45731 | 0.617 | 53.64719 | 0.719 | 50.29524 |
| 2019 | 0.562 | 49.75283 | 0.705 | 50.20043 | 0.521 | 50.45092 | 0.623 | 53.6302  | 0.724 | 50.23071 |

| <b>Table S30 (continued).</b> |           |          |          |          |             |          |          |          |  |
|-------------------------------|-----------|----------|----------|----------|-------------|----------|----------|----------|--|
| Year                          | Sri Lanka |          | Thailand |          | Timor-Leste |          | Viet Nam |          |  |
|                               | SDI       | Rate     | SDI      | Rate     | SDI         | Rate     | SDI      | Rate     |  |
| 1990                          | 0.504     | 50.14077 | 0.508    | 50.30401 | 0.274       | 49.61042 | 0.39     | 50.54115 |  |
| 1991                          | 0.511     | 50.19312 | 0.518    | 50.30914 | 0.28        | 49.59292 | 0.397    | 50.48902 |  |
| 1992                          | 0.518     | 50.25917 | 0.527    | 50.37918 | 0.286       | 49.59731 | 0.404    | 50.50056 |  |
| 1993                          | 0.525     | 50.21916 | 0.536    | 50.40585 | 0.293       | 49.5886  | 0.412    | 50.51618 |  |
| 1994                          | 0.532     | 50.23152 | 0.544    | 50.35035 | 0.3         | 49.56837 | 0.42     | 50.54364 |  |
| 1995                          | 0.539     | 50.23228 | 0.553    | 50.37555 | 0.308       | 49.56585 | 0.429    | 50.52373 |  |
| 1996                          | 0.547     | 50.20912 | 0.562    | 50.37405 | 0.317       | 49.50353 | 0.438    | 50.58926 |  |
| 1997                          | 0.554     | 50.28813 | 0.569    | 50.41128 | 0.326       | 49.36413 | 0.447    | 50.5129  |  |
| 1998                          | 0.561     | 50.27472 | 0.574    | 50.41973 | 0.334       | 49.18528 | 0.455    | 50.64795 |  |
| 1999                          | 0.567     | 50.31036 | 0.578    | 50.45987 | 0.339       | 49.00626 | 0.463    | 50.65938 |  |
| 2000                          | 0.573     | 50.303   | 0.583    | 50.46362 | 0.345       | 48.99619 | 0.471    | 50.64267 |  |
| 2001                          | 0.578     | 50.3352  | 0.589    | 50.50081 | 0.352       | 49.10845 | 0.478    | 50.71392 |  |
| 2002                          | 0.582     | 50.32208 | 0.594    | 50.50651 | 0.358       | 49.27595 | 0.486    | 50.68587 |  |
| 2003                          | 0.587     | 50.32322 | 0.599    | 50.57686 | 0.364       | 49.45993 | 0.493    | 50.76065 |  |
| 2004                          | 0.592     | 50.38995 | 0.605    | 50.53166 | 0.374       | 49.67942 | 0.501    | 50.7817  |  |
| 2005                          | 0.597     | 50.33748 | 0.61     | 50.53462 | 0.388       | 49.76113 | 0.509    | 50.86018 |  |
| 2006                          | 0.602     | 50.42361 | 0.616    | 50.52943 | 0.406       | 49.83591 | 0.517    | 50.7476  |  |
| 2007                          | 0.609     | 50.41254 | 0.623    | 50.54532 | 0.421       | 49.85628 | 0.525    | 50.7411  |  |

|      |       |          |       |          |       |          |       |          |
|------|-------|----------|-------|----------|-------|----------|-------|----------|
| 2008 | 0.615 | 50.41301 | 0.629 | 50.59608 | 0.436 | 49.88624 | 0.533 | 50.67539 |
| 2009 | 0.621 | 50.50018 | 0.633 | 50.6287  | 0.448 | 49.85936 | 0.541 | 50.6851  |
| 2010 | 0.628 | 50.45744 | 0.638 | 50.62527 | 0.458 | 49.86767 | 0.549 | 50.74439 |
| 2011 | 0.636 | 50.49749 | 0.643 | 50.64806 | 0.469 | 49.90901 | 0.558 | 50.74674 |
| 2012 | 0.644 | 50.46153 | 0.649 | 50.68156 | 0.48  | 49.96773 | 0.566 | 50.7596  |
| 2013 | 0.651 | 50.50321 | 0.655 | 50.72292 | 0.488 | 50.09476 | 0.573 | 50.76715 |
| 2014 | 0.658 | 50.52314 | 0.66  | 50.71605 | 0.493 | 50.07451 | 0.581 | 50.72641 |
| 2015 | 0.666 | 50.4958  | 0.666 | 50.71654 | 0.498 | 50.14102 | 0.589 | 50.73534 |
| 2016 | 0.672 | 50.51801 | 0.671 | 50.72037 | 0.503 | 50.10019 | 0.596 | 50.7681  |
| 2017 | 0.678 | 50.53557 | 0.676 | 50.68605 | 0.508 | 50.0677  | 0.604 | 50.70267 |
| 2018 | 0.684 | 50.49595 | 0.682 | 50.71221 | 0.511 | 50.12012 | 0.611 | 50.70459 |
| 2019 | 0.69  | 50.5337  | 0.687 | 50.73893 | 0.514 | 50.09224 | 0.617 | 50.71683 |
